# Supplementary material for: Rapid synthesis of isoquinolinones by intramolecular coupling of amides and ketones
Source: Royal Society of Chemistry journal article supplement (doi:10.1039/c4ob01948b), 2014-10-30

## Supporting information

### **An expedite synthesis of isoquinolinones by intramolecular coupling of amides and ketones**

Wen-Tao Wei, Yu Liu, Lin-Miao Ye, Rong-Hui Lei, Xue-Jing Zhang and Ming Yan\*

*Institute of Drug Synthesis and Pharmaceutical Process, School of Pharmaceutical Sciences, Sun Yat-sen*

*University, Guangzhou 510006, China. E-mail: [yanming@mail.sysu.edu.cn](mailto:yanming@mail.sysu.edu.cn)*

---

## Table of Contents

|                                                 |    |
|-------------------------------------------------|----|
| 1. General Information                          | S2 |
| 2. General Procedures                           | S3 |
| 3. References                                   | S4 |
| 4. $^1\text{H}$ and $^{13}\text{C}$ NMR Spectra | S5 |

---

## 1. General Information

$^1\text{H}$  NMR and  $^{13}\text{C}$  NMR spectra were recorded on Bruker AVANCE 400 spectrometer. Chemical shifts of protons are reported in parts per million downfield from tetramethylsilane and are referenced to residual protium in the NMR solvent ( $\text{CDCl}_3$ ;  $\delta$  7.26). Chemical shifts of carbon are referenced to the carbon resonances of the solvent ( $\text{CDCl}_3$ ;  $\delta$  77.0). Peaks are labeled as singlet (s), doublet (d), triplet (t), quartet (q) and multiplet (m). Melting points were measured on a WRS-2A melting point apparatus and are uncorrected. Infrared (IR) spectra were recorded on a Bruker Tensor 37 spectrophotometer. Data are represented as follows: frequency of absorption ( $\text{cm}^{-1}$ ). All products were further characterized by HRMS (high resolution mass spectra). Copies of their  $^1\text{H}$  NMR and  $^{13}\text{C}$  NMR spectra were provided.  $\text{KO}t\text{-Bu}$  (99.99%) were purchased from Sigma-Aldrich and used without further purification.

## 2. General Procedures

### (I) Typical procedure for the preparation of substrates 1a-1w.

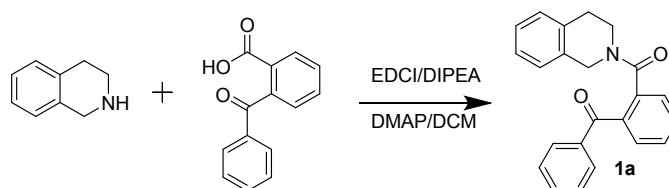

The compound was synthesized according to a known procedure.<sup>[1][2]</sup> A solution of 1,2,3,4-tetrahydroisoquinoline (0.67 g, 5.0 mmol) and 2-benzoylbenzoic acid (1.13 g, 5.0 mmol) in DCM (50 mL), was added EDCI (1.15 g, 6.0 mmol). The mixture was stirred for five minutes. DIPEA (774 mg, 6.0 mmol) and DMAP (61 mg, 0.5 mmol) were added successively. The reaction mixture was stirred for 15 h at room temperature. After the completion of the reaction as shown by TLC, water (30 mL) was used to dilute the reaction mixture. The organic layer was extracted with DCM (20 mL  $\times$  3). The combined organic layer was washed with saturated brine (30 mL), dried over anhydrous magnesium sulfate and concentrated under vacuum. The crude product was purified by flash chromatography (ethyl acetate/petroleum ether = 1:1) to give **1a** as a white solid (1.36 g, yield: 80%).

### (II) Typical procedure for intramolecular coupling of 1a

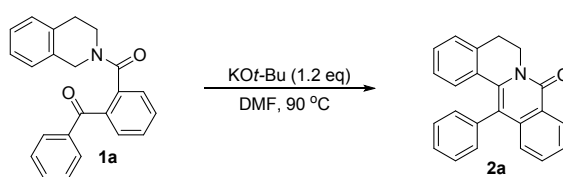

A solution of (2-benzoylphenyl)(3,4-dihydroisoquinolin-2(1H)-yl)methanone **1a** (68.4 mg, 0.2 mmol), KO<sup>t</sup>-Bu (27.0 mg, 0.24 mmol) in DMF (2 mL) was stirred at 90 °C under an argon atmosphere. After the completion of the reaction as shown by TLC, the solvent was removed under vacuum. The crude product was purified by flash chromatography (ethyl acetate/petroleum ether = 1:3) to give **2a** as a white solid (52.3 mg, yield: 81%).

---

### 3. References

- [1] F. M. Santangelo, K. K. Ogden, K. L. Strong, A. Khatri, K. M. Chepiga, H. S. Jensen, S. F. Traynelis and D. C. Liotta, *J. Med. Chem.* **2013**, *56*, 5351.
- [2] G. Tang, C. Yang, Z. Nikolovska-Coleska, J. Guo and S. Qiu, *J. Med. Chem.* **2007**, *50*, 1723.

## 4. $^1\text{H}$ and $^{13}\text{C}$ NMR Spectra

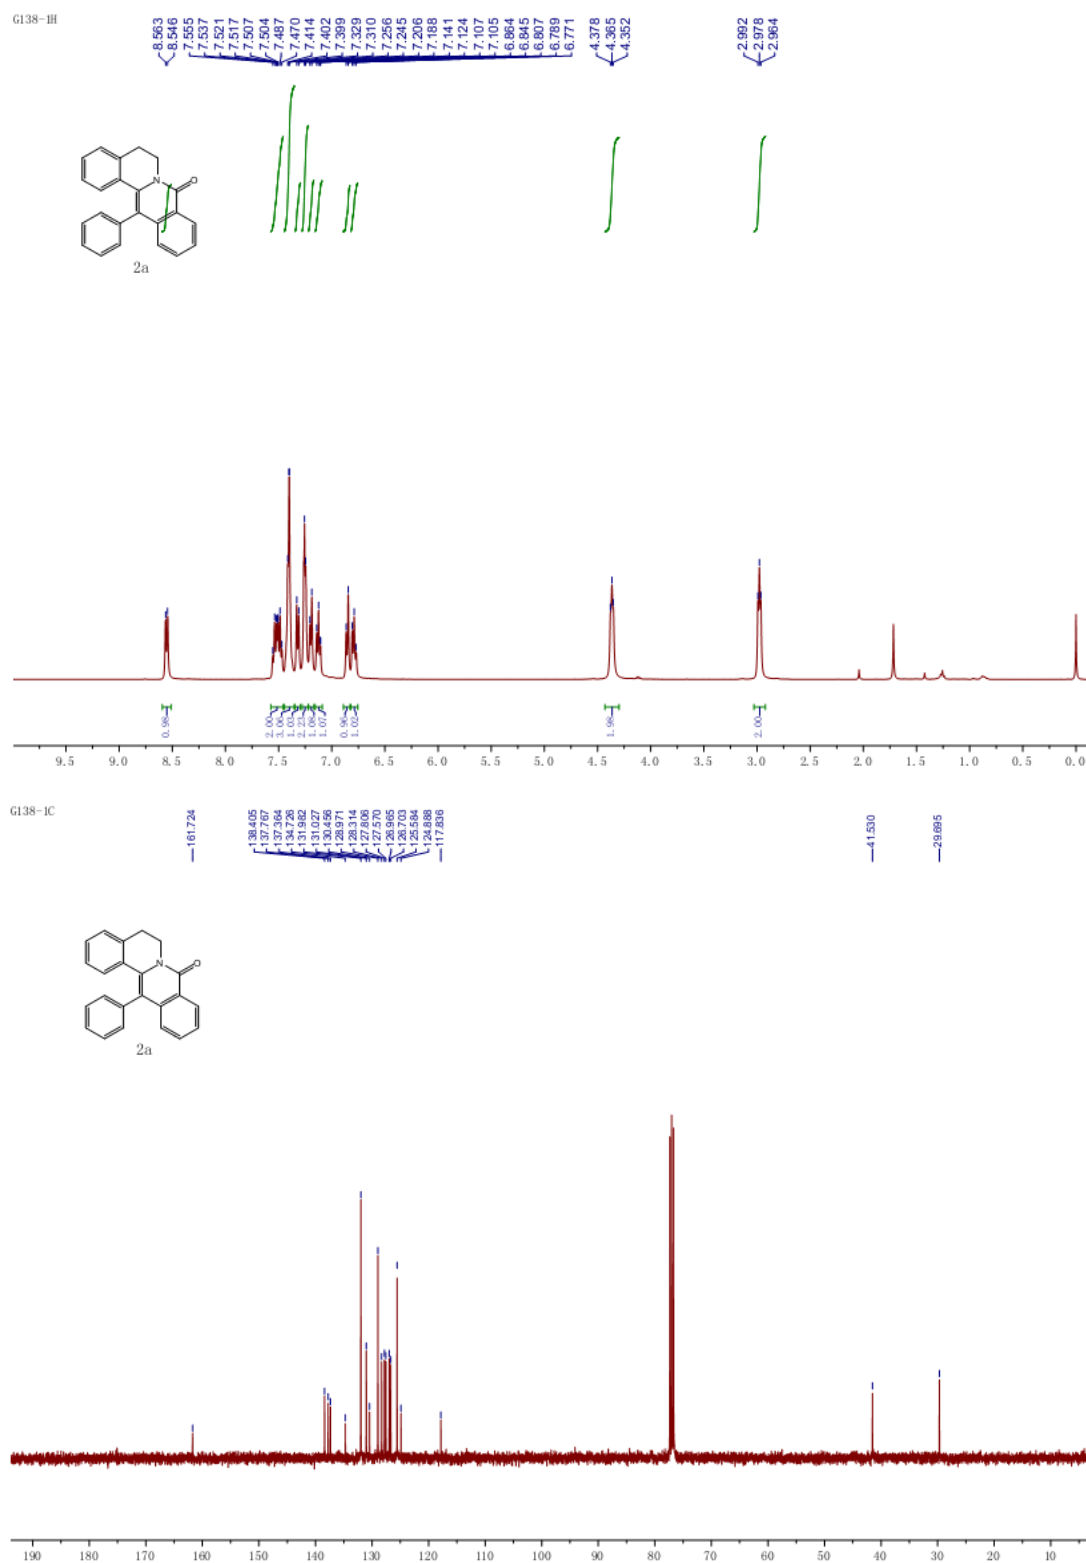

G278-III

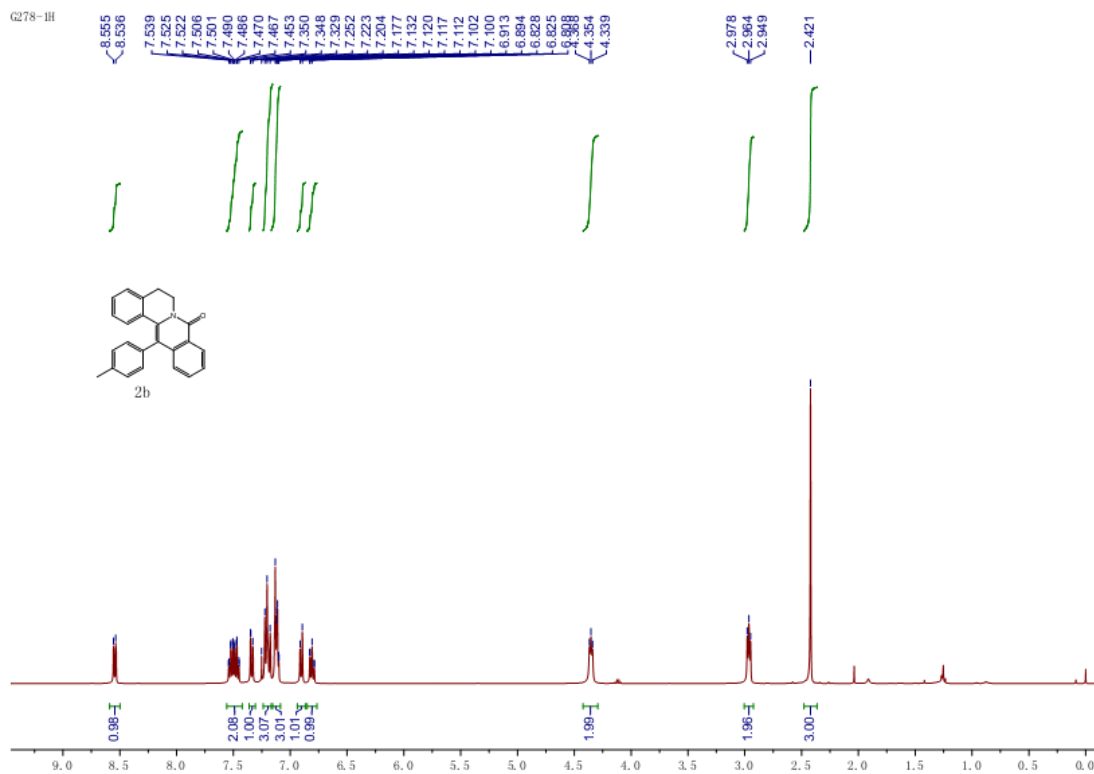

G278-IC

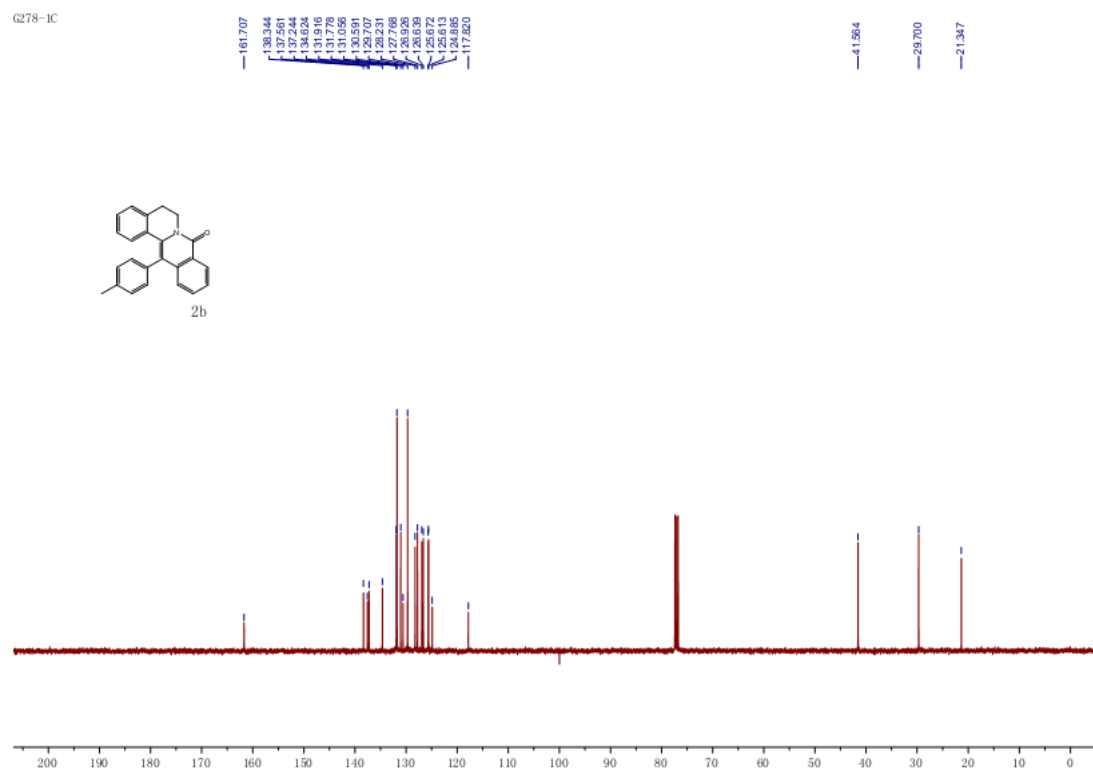

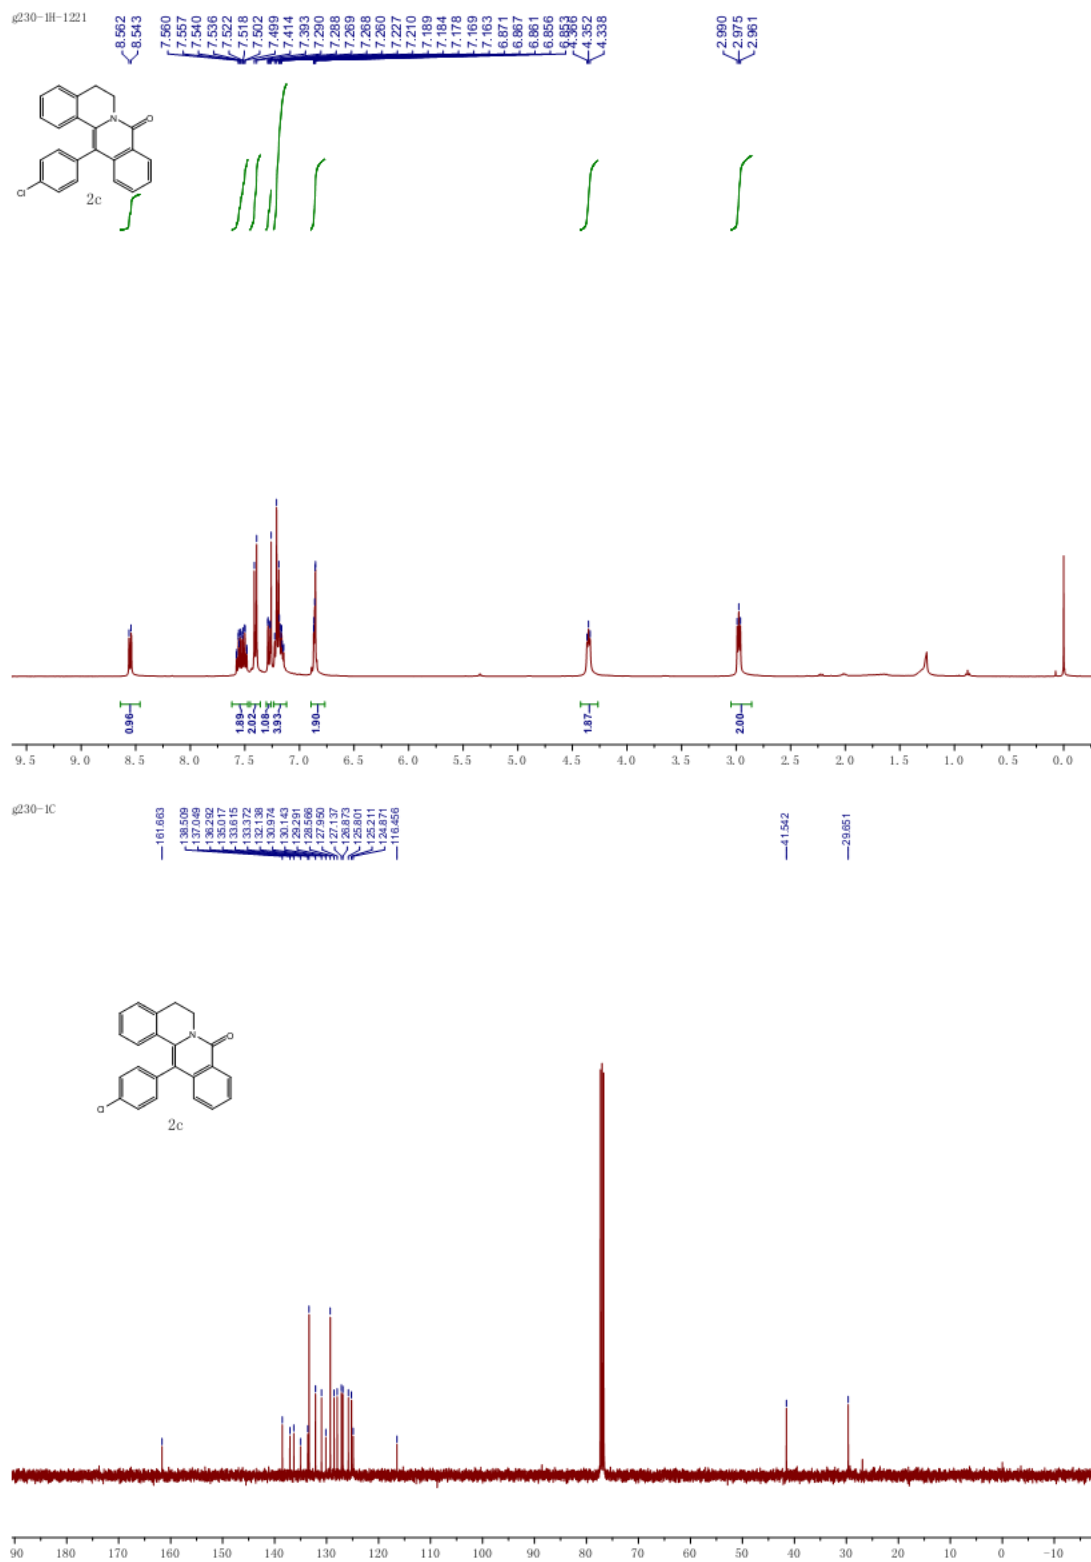



g234-H-1224

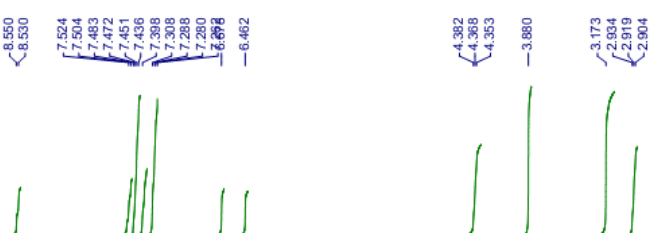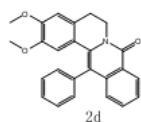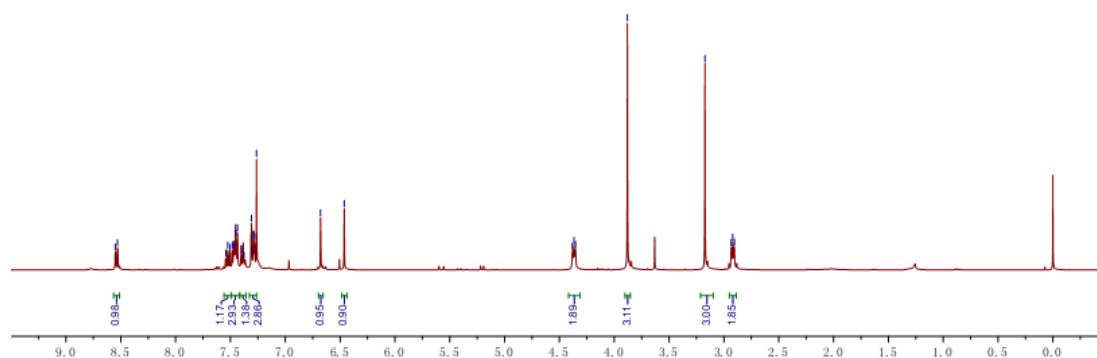

G234-1C

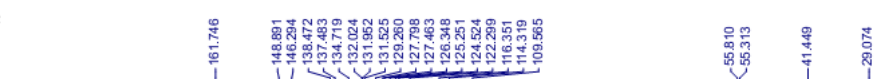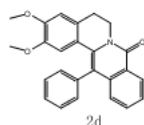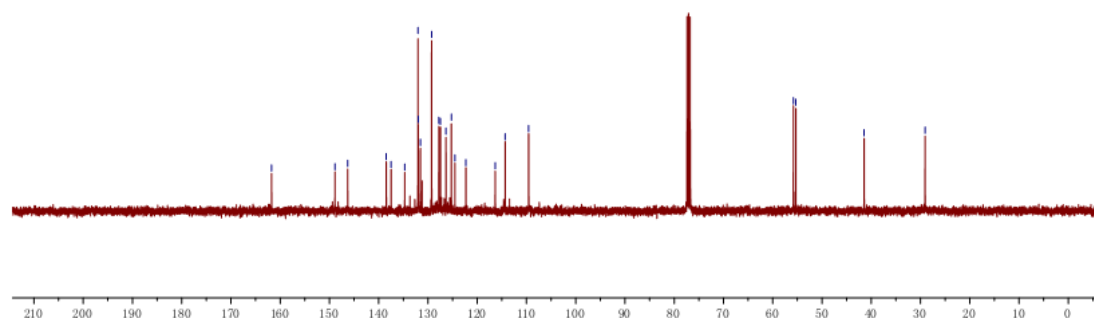

g235-H-1224

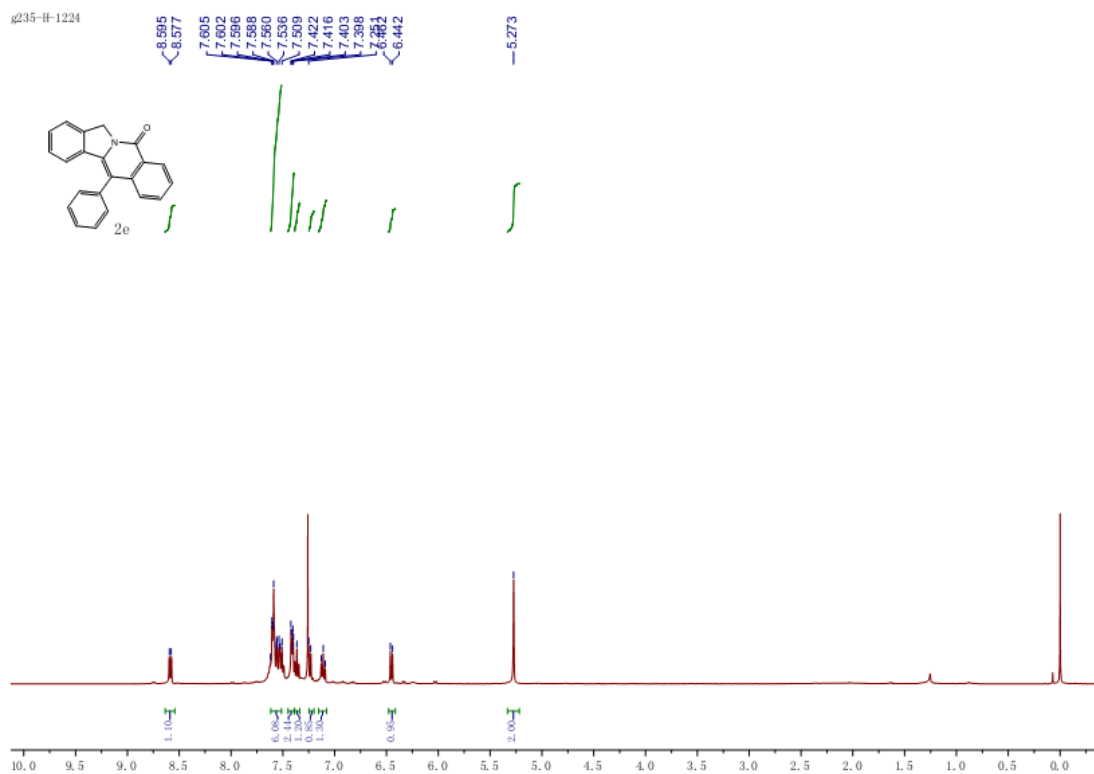

G235-1C

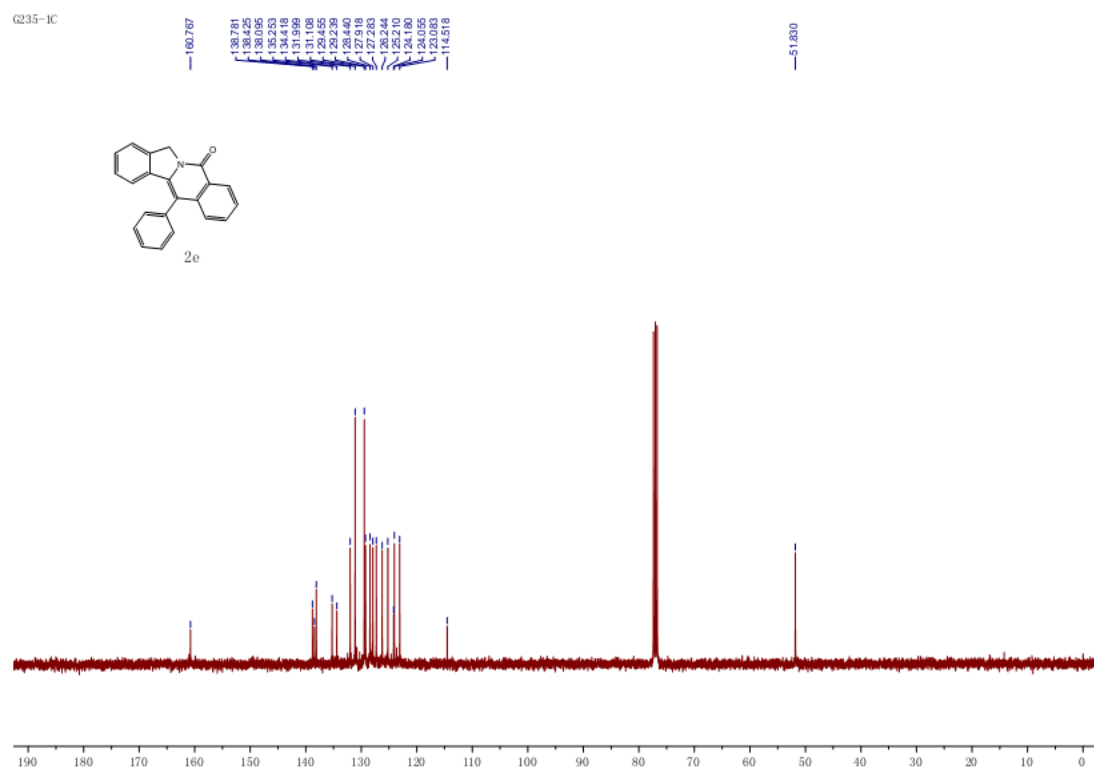

Q243-1

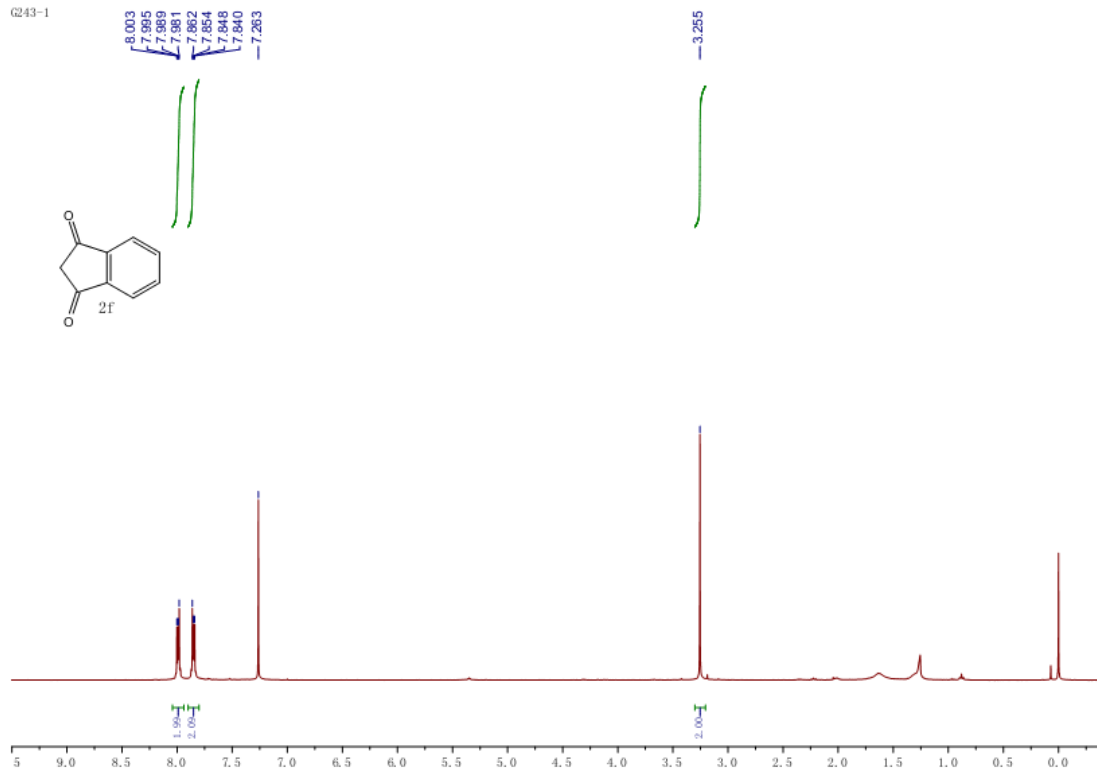

g321-c

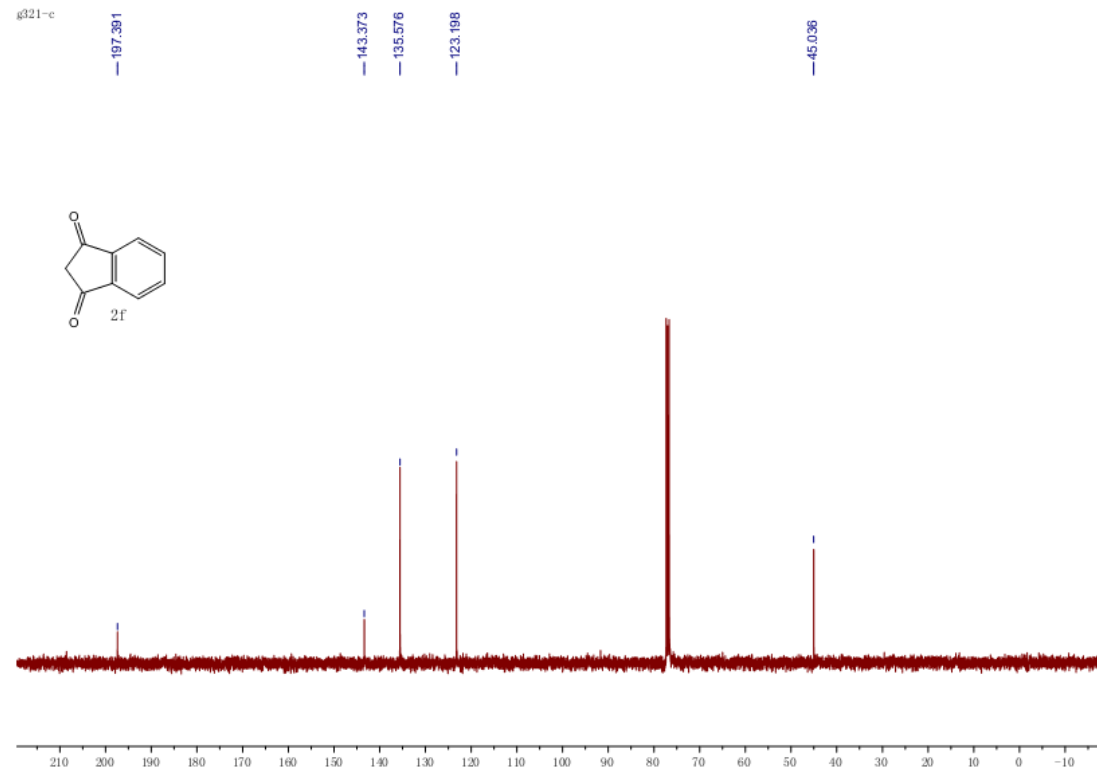

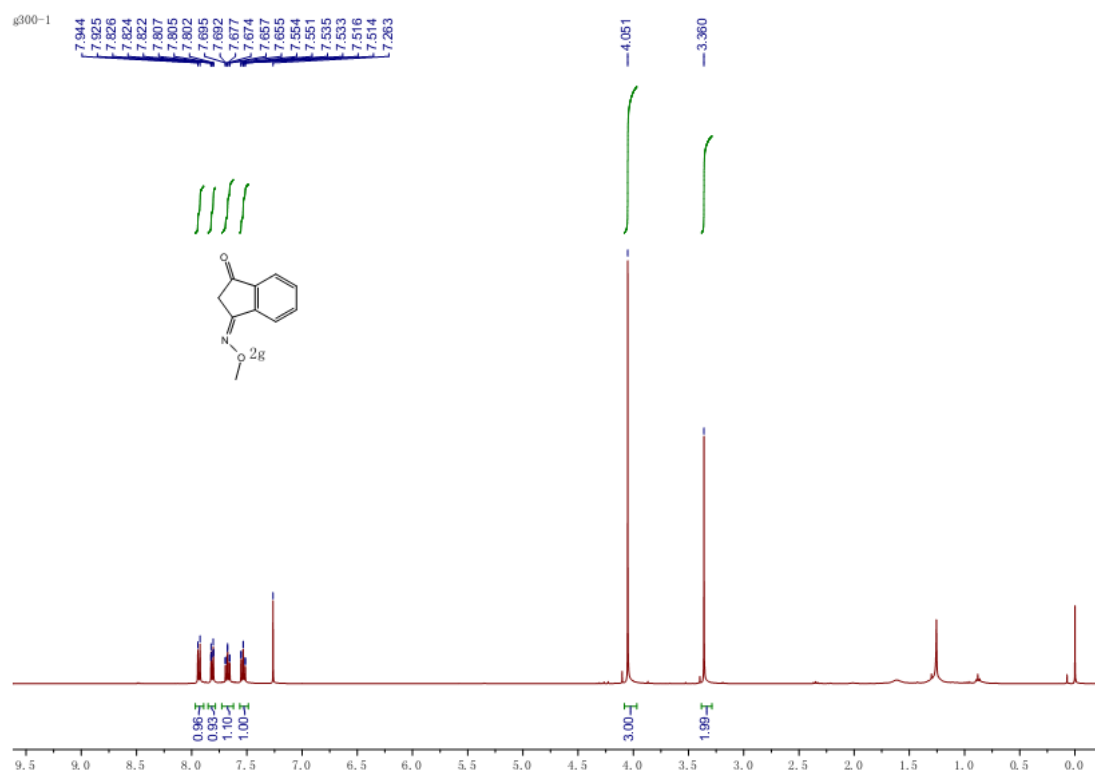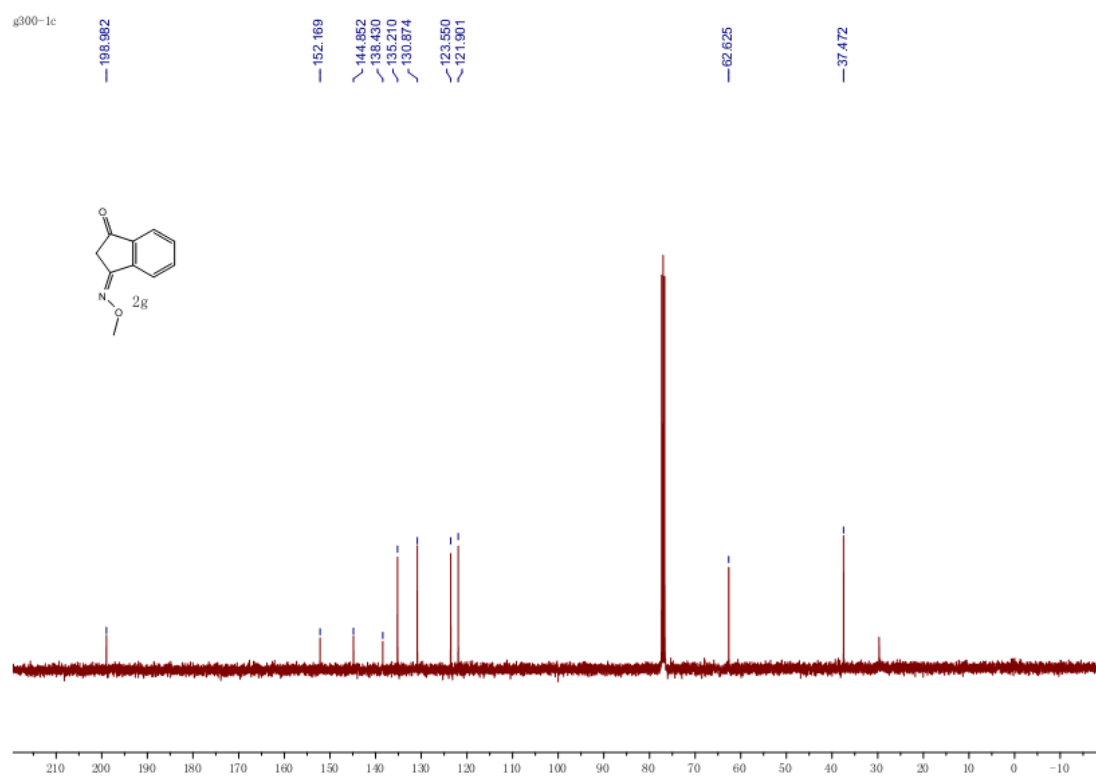

G140-III-0929

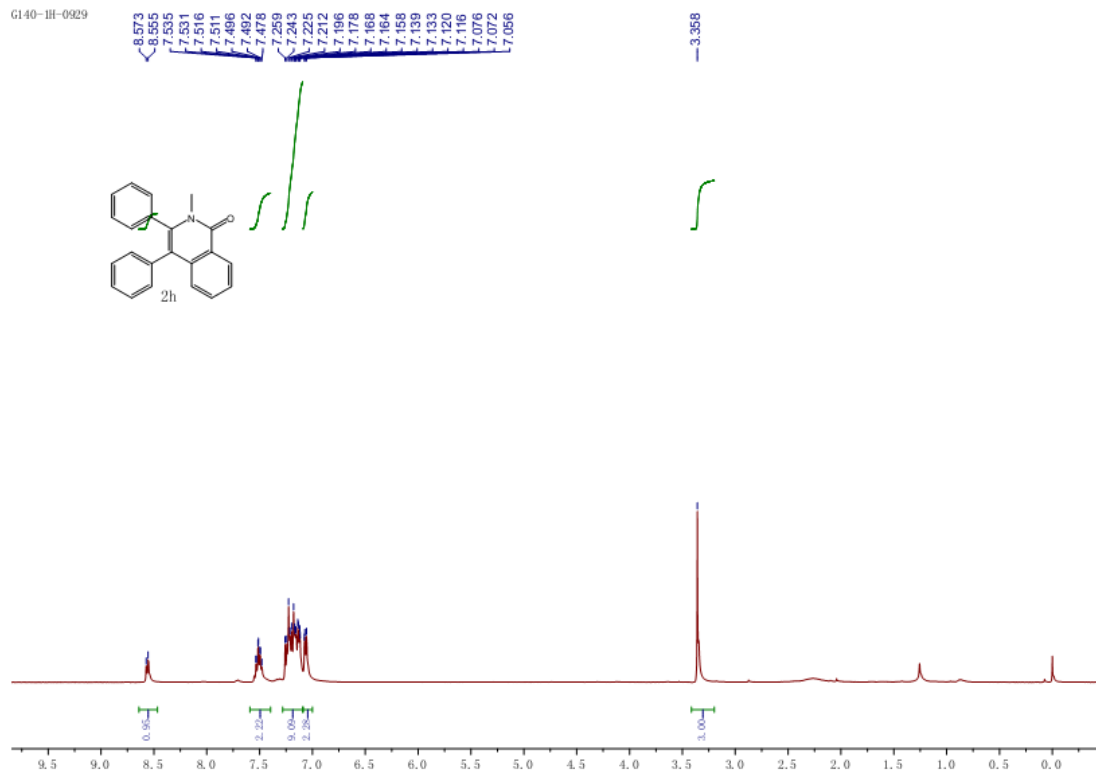

G140-IC

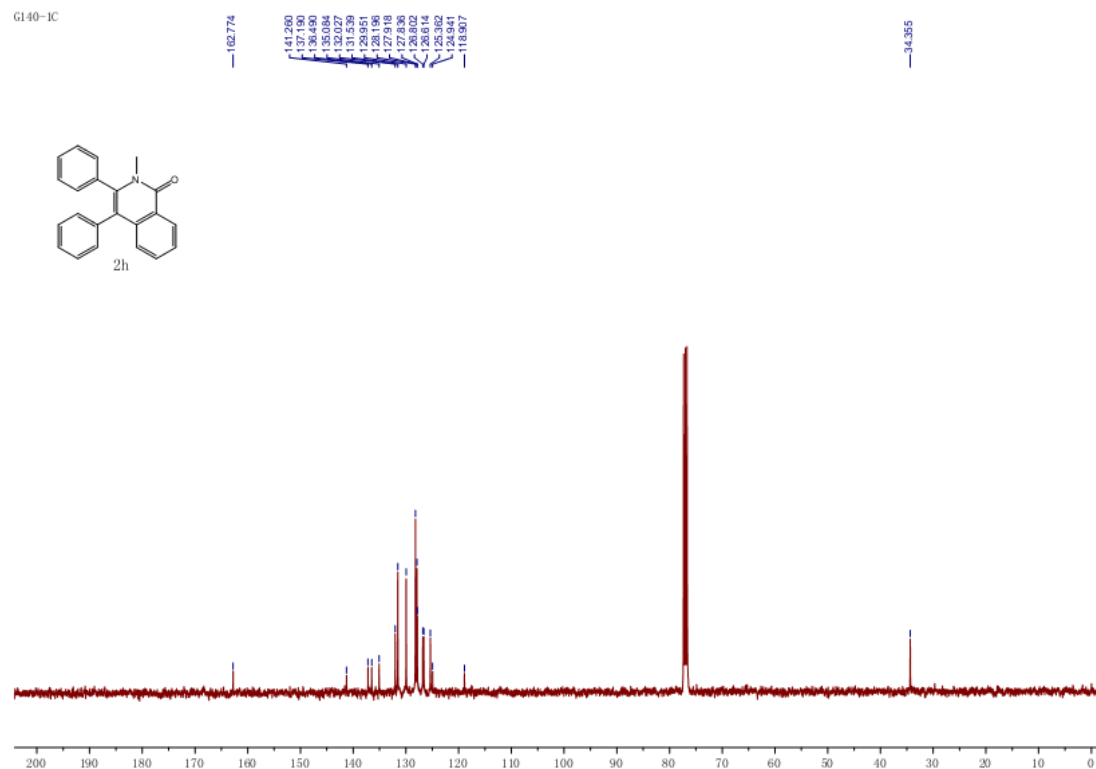

G233-III

CCOC(=O)C1=CC=C(C2=CC=CC=C2C1=CC=CC=C2)C3=CC=CC=C3

2i

1H NMR spectrum (CDCl<sub>3</sub>) of compound 2i. The spectrum shows peaks at 8.575, 8.557, 7.545, 7.528, 7.505, 7.488, 7.473, 7.259, 7.233, 7.218, 7.178, 7.164, 7.159, 7.148, 7.136, 7.123, 7.067, 7.047, 3.980, 3.963, 3.945, 3.928, 1.190, 1.173, and 1.155 ppm. Integration values are 0.09, 2.00, 1.96, 1.96, 2.00, and 3.00.

6233-1C

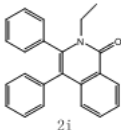

2i



162.070  
141.109  
137.203  
136.622  
134.817  
132.009  
131.535  
130.212  
128.189  
127.925  
127.674  
127.530  
126.728  
126.548  
125.349  
125.225  
119.108  
41.376  
14.154

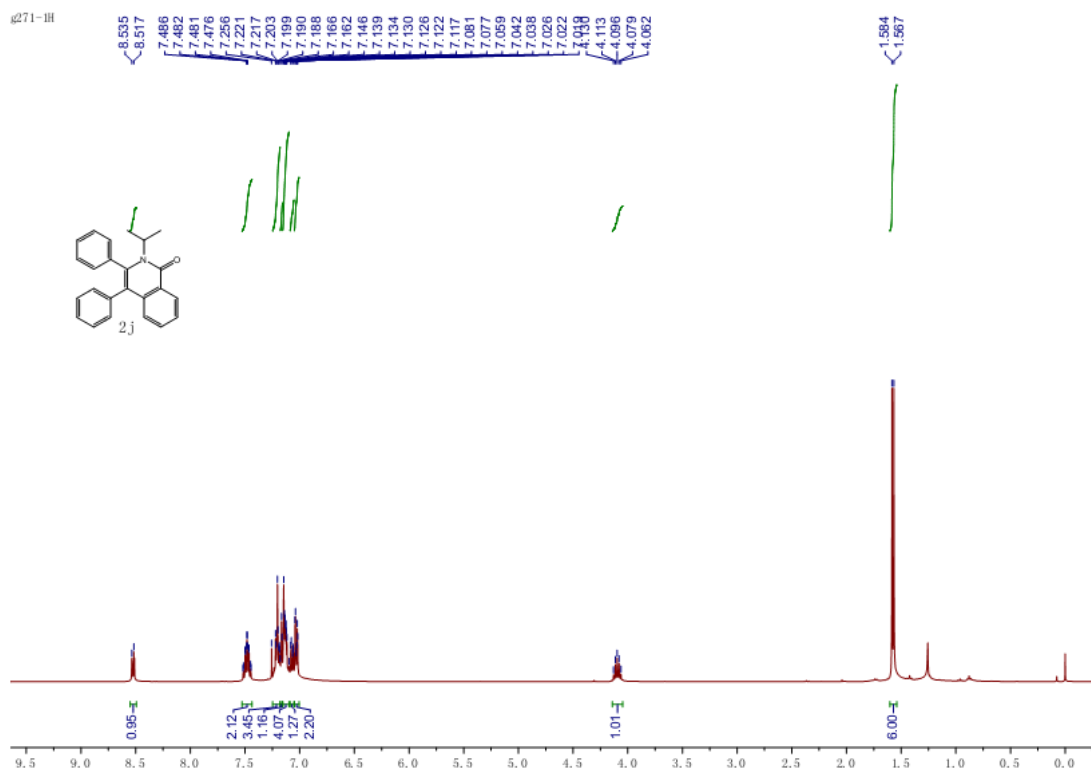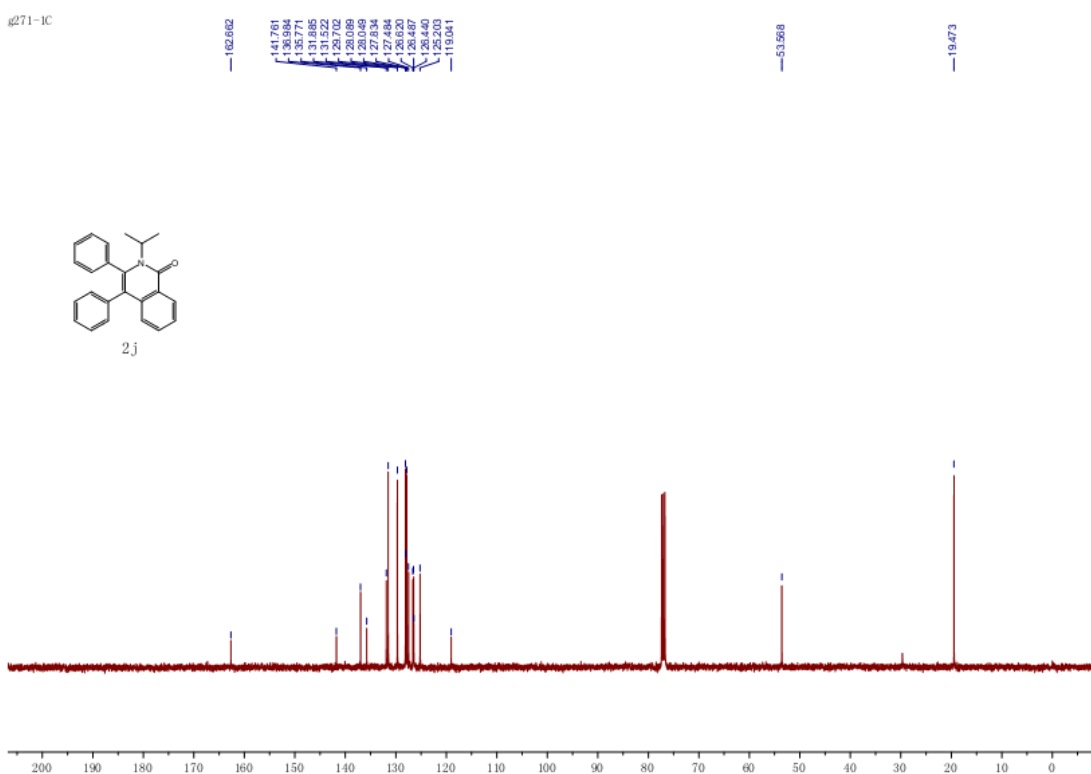

G287-III

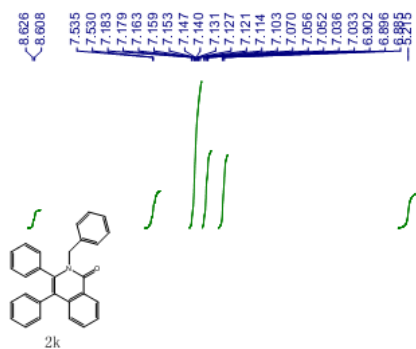

G287-IC

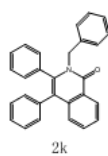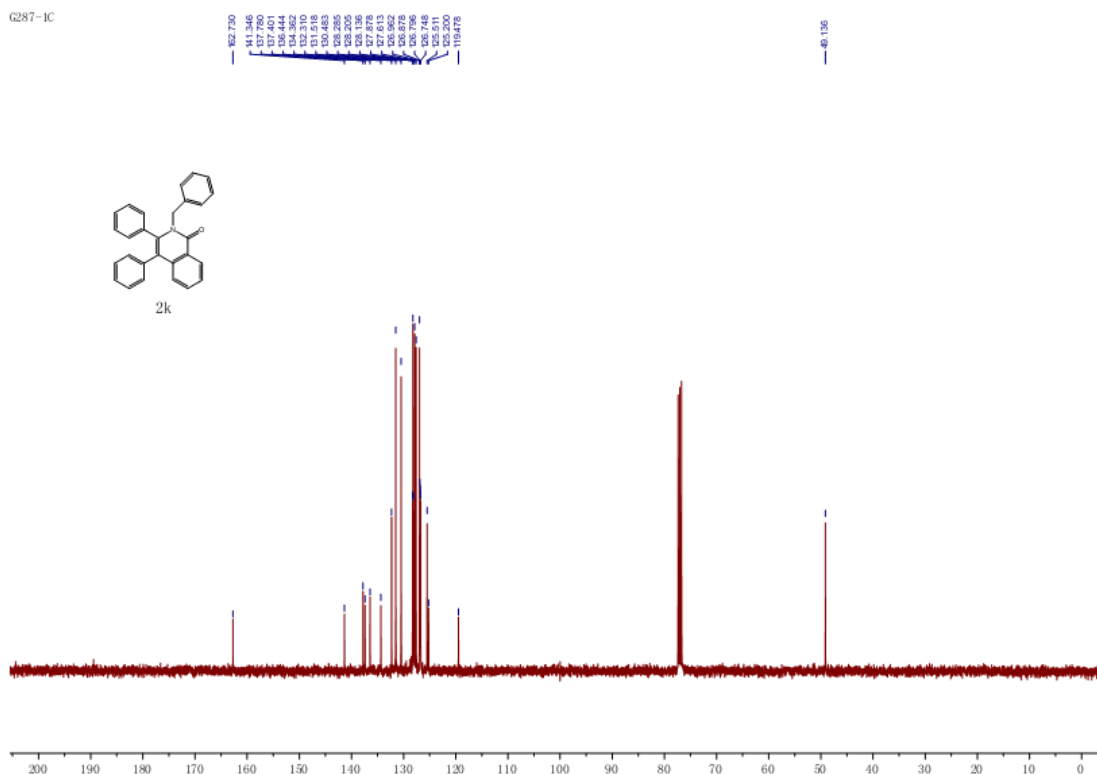



G267-III-0116

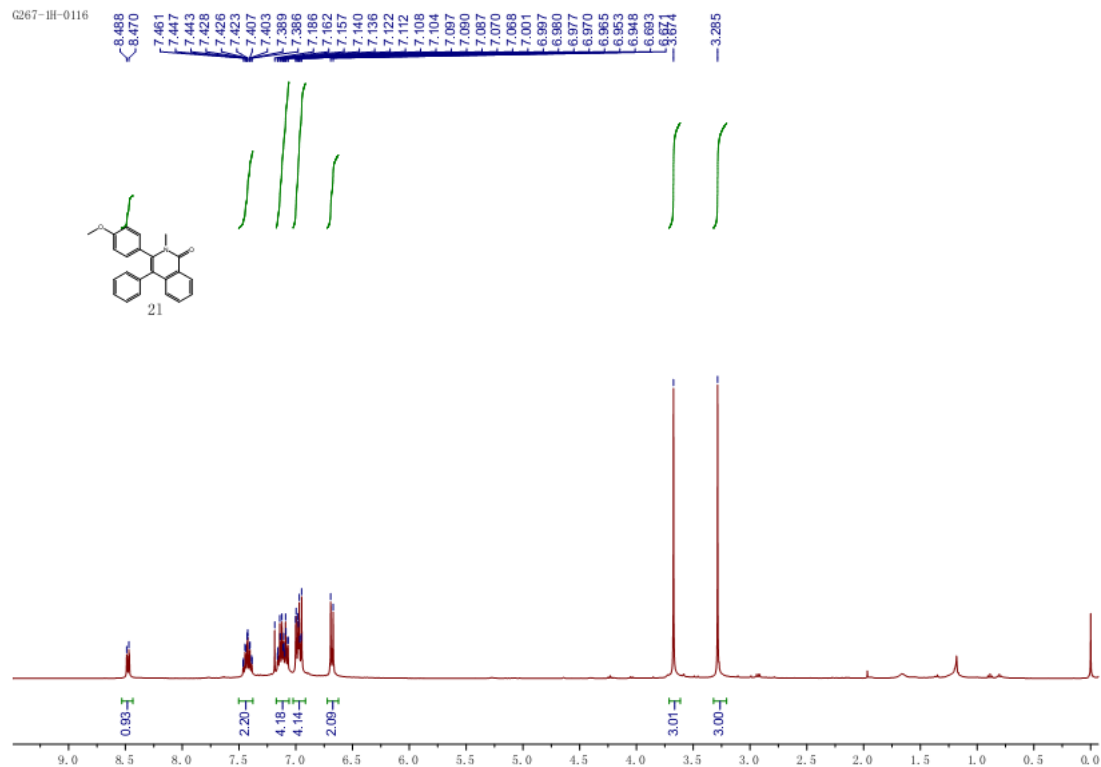

G267-I-C

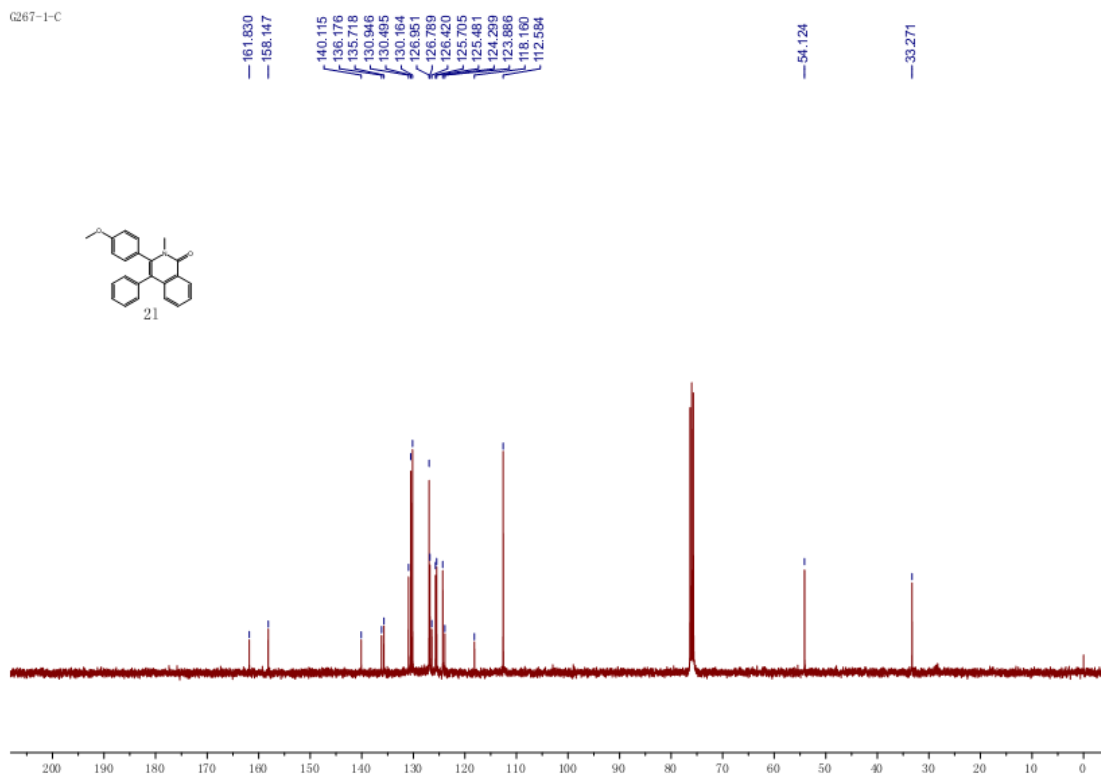

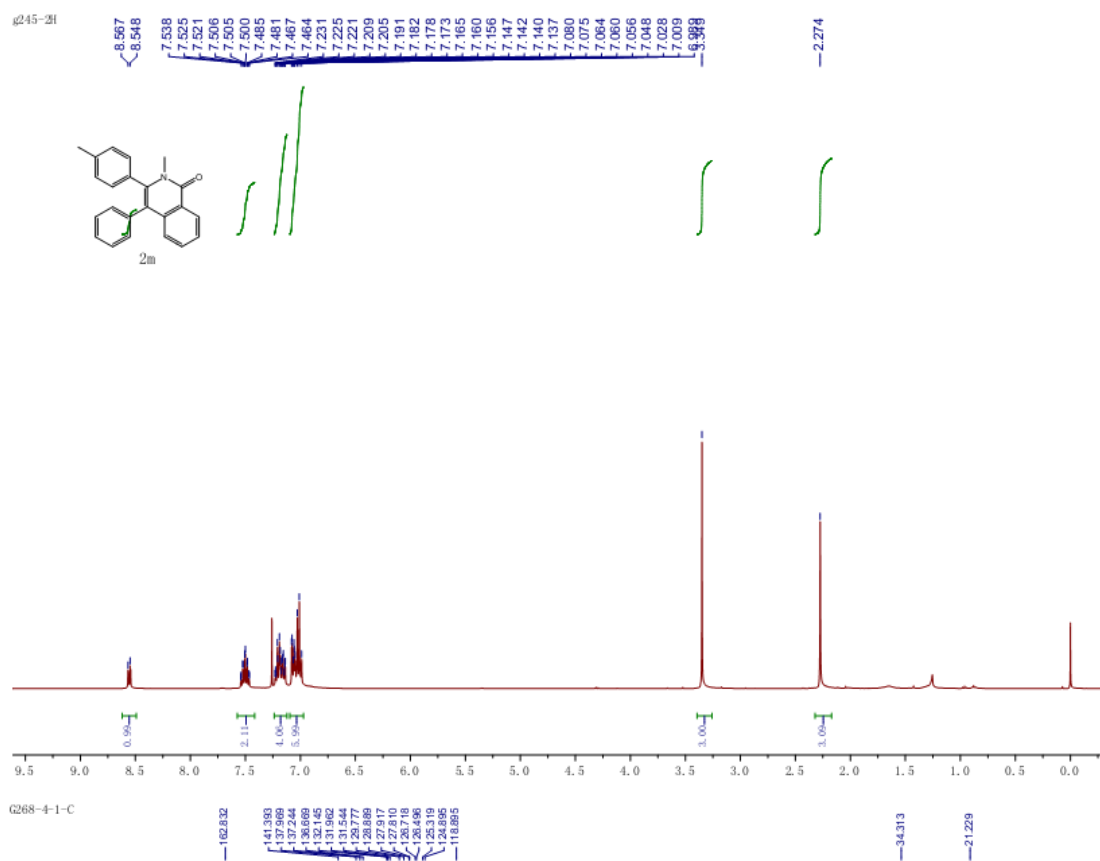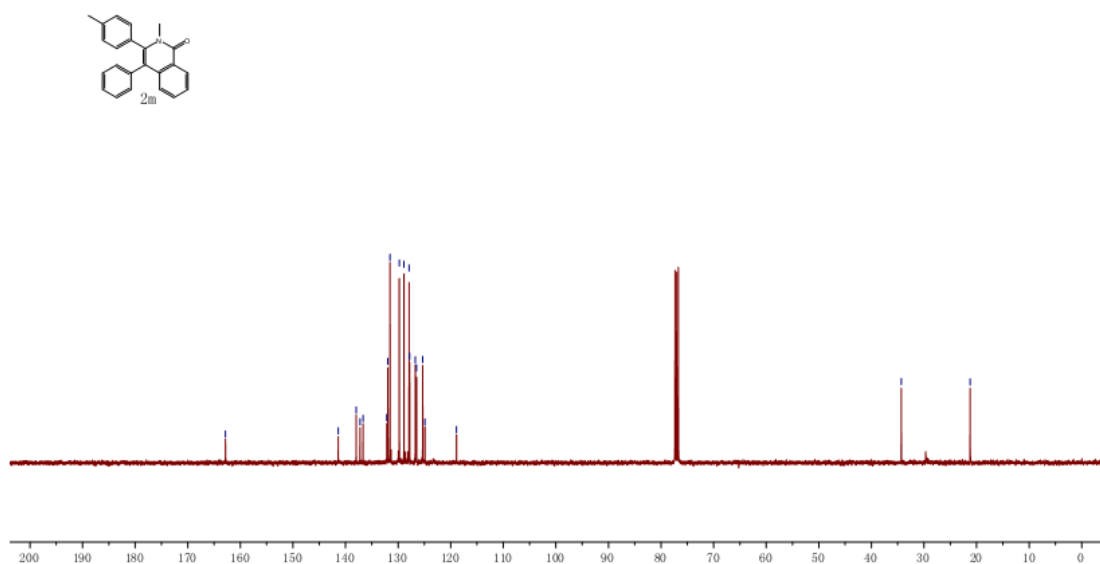

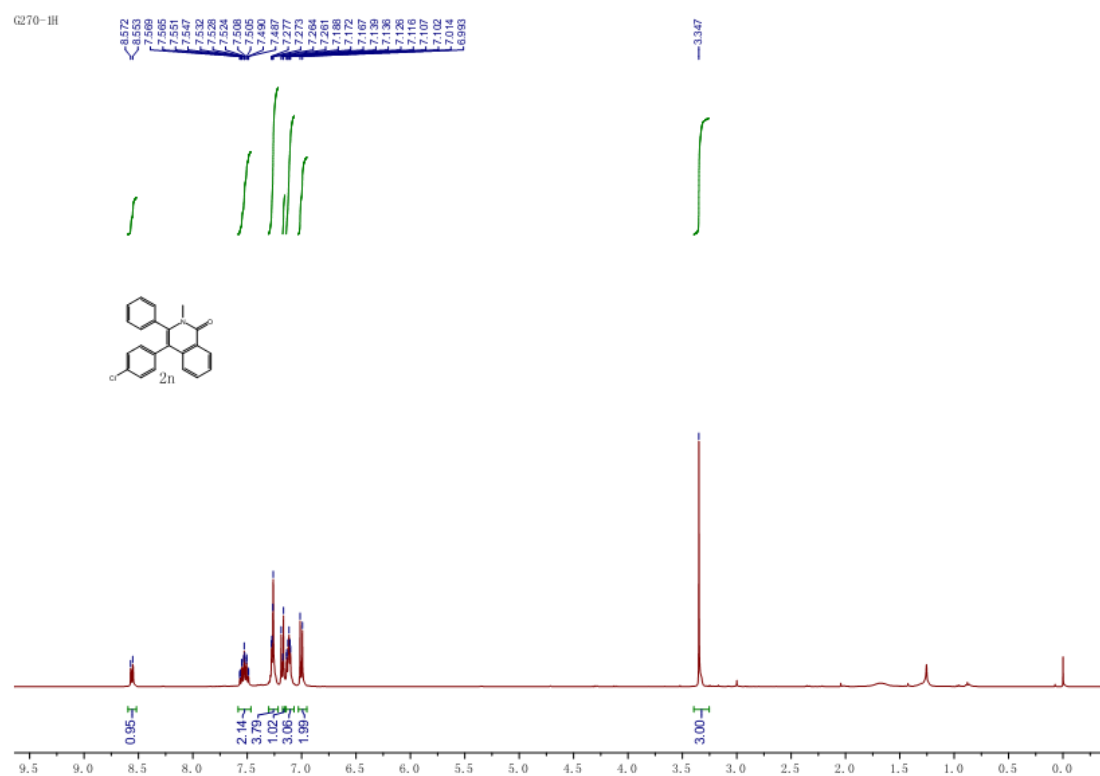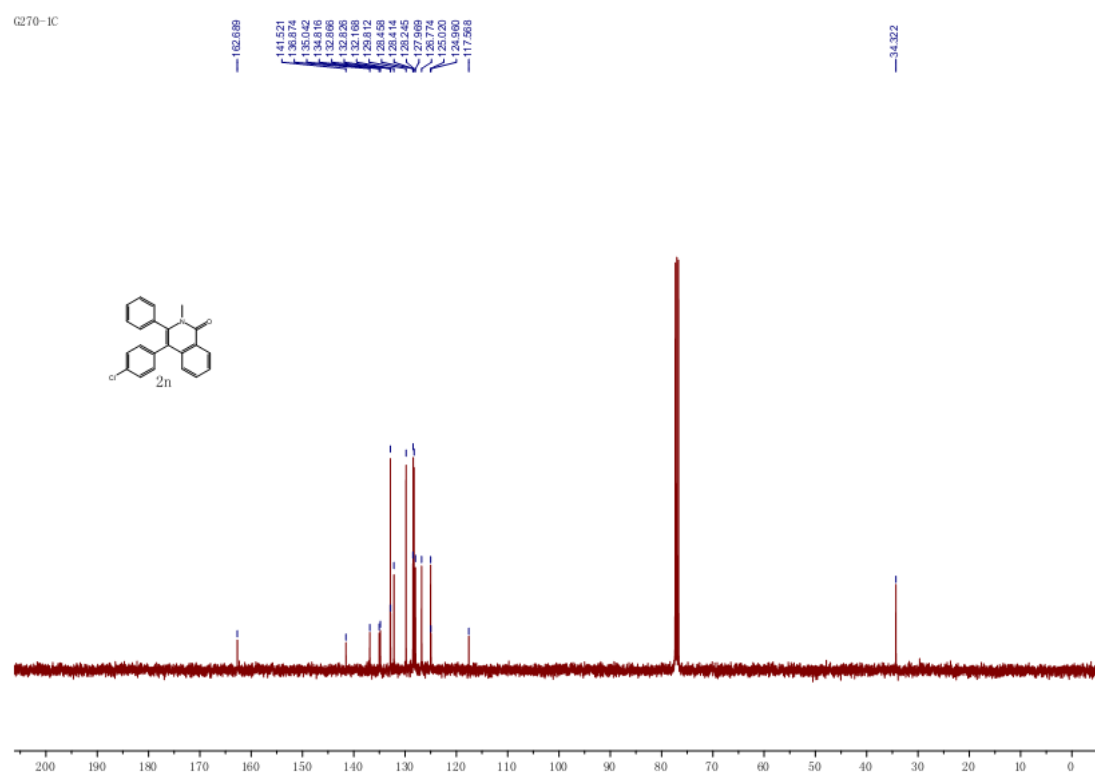



G500-III

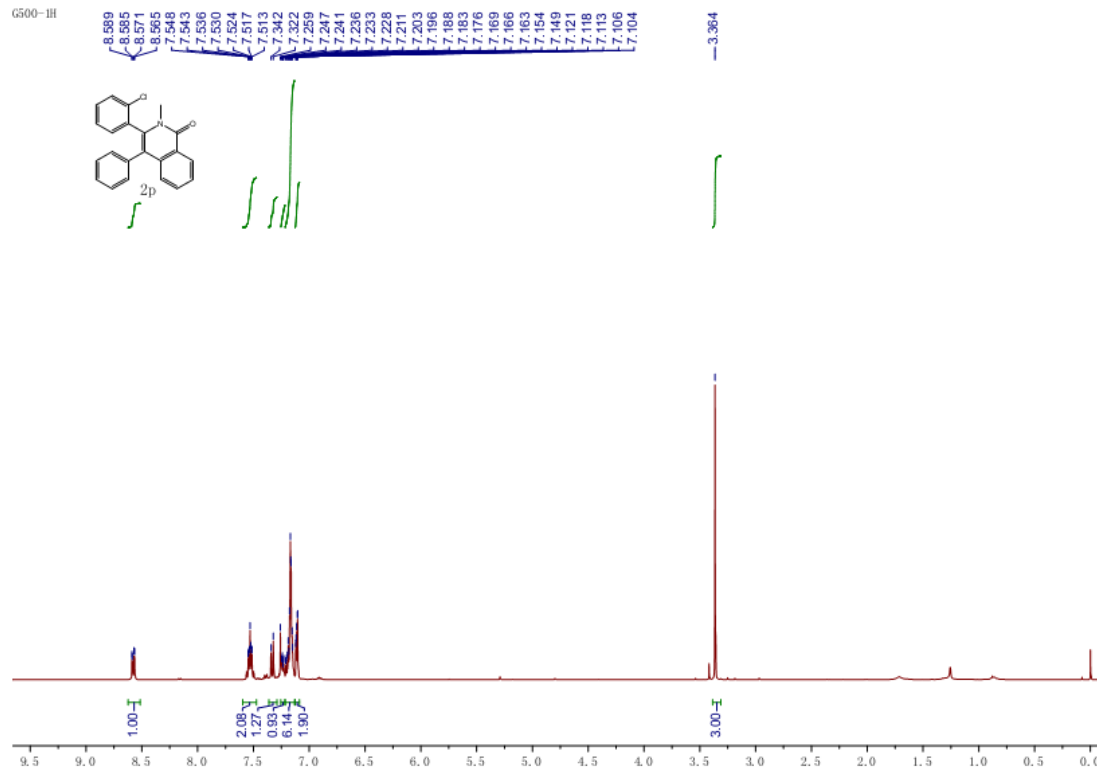

G500-IC

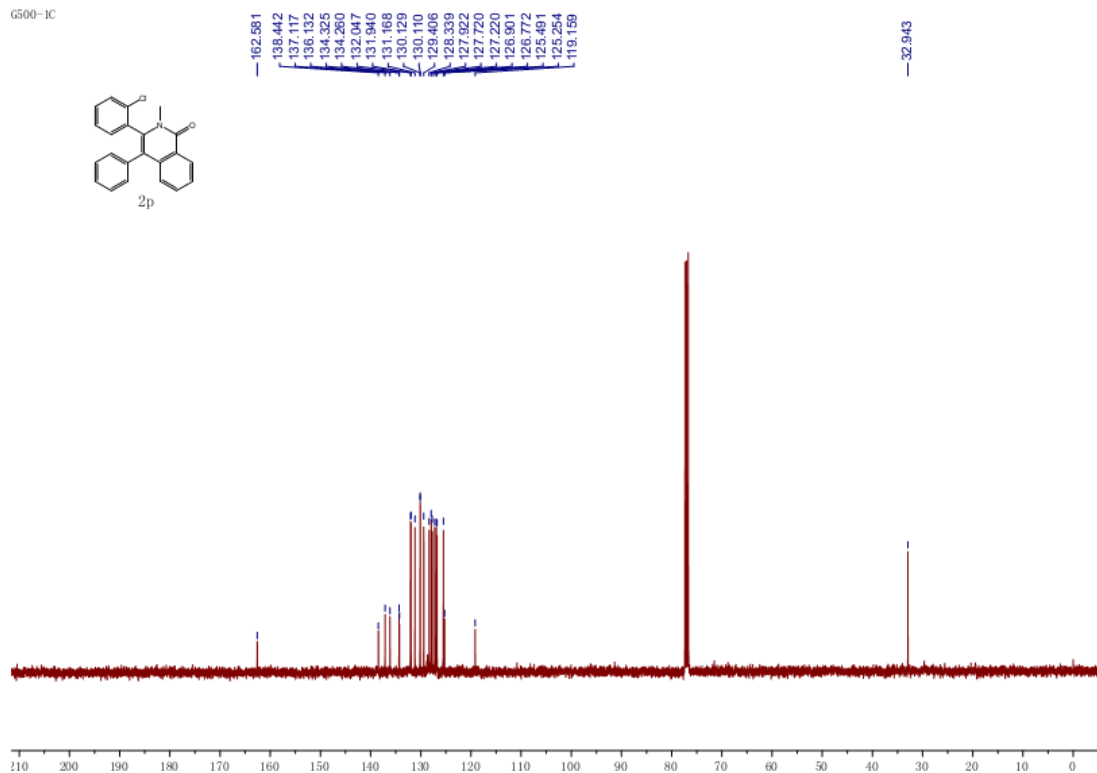

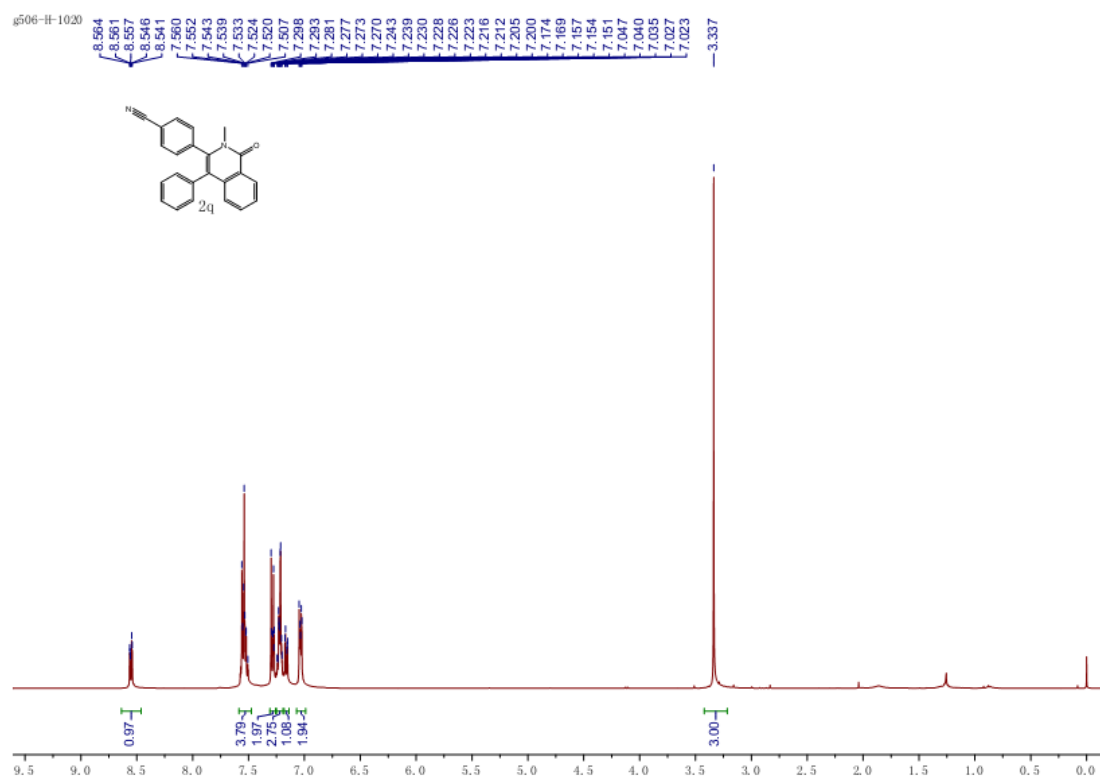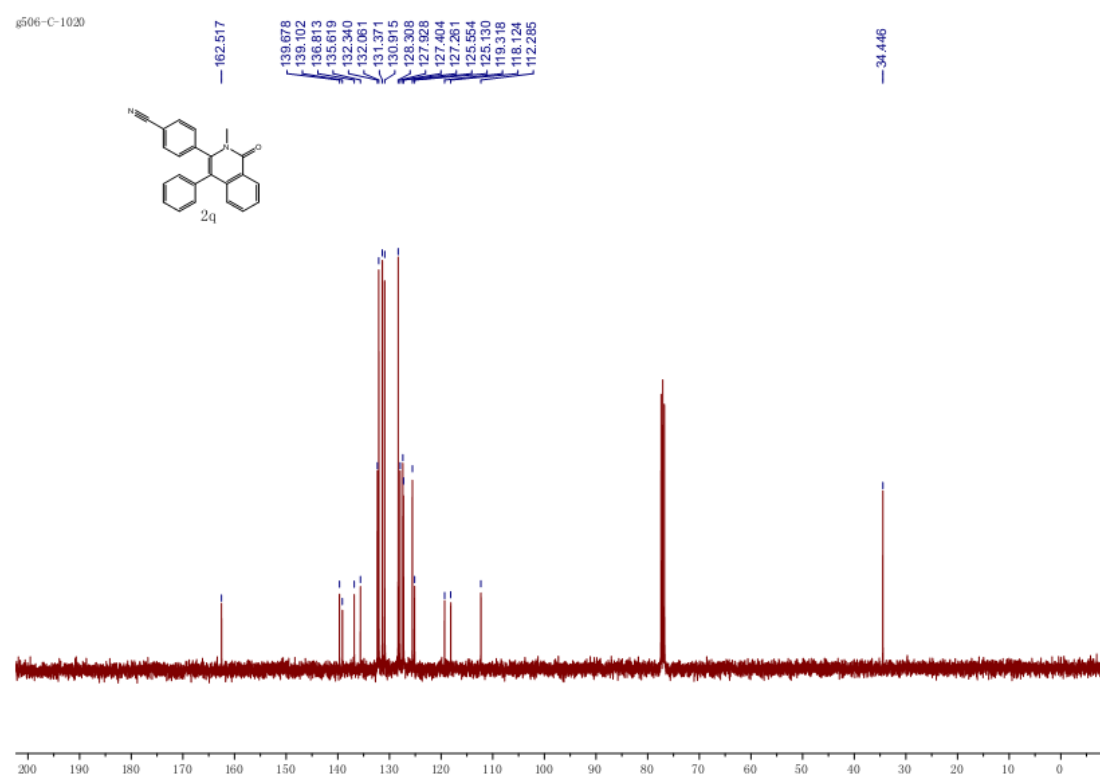

G507-III

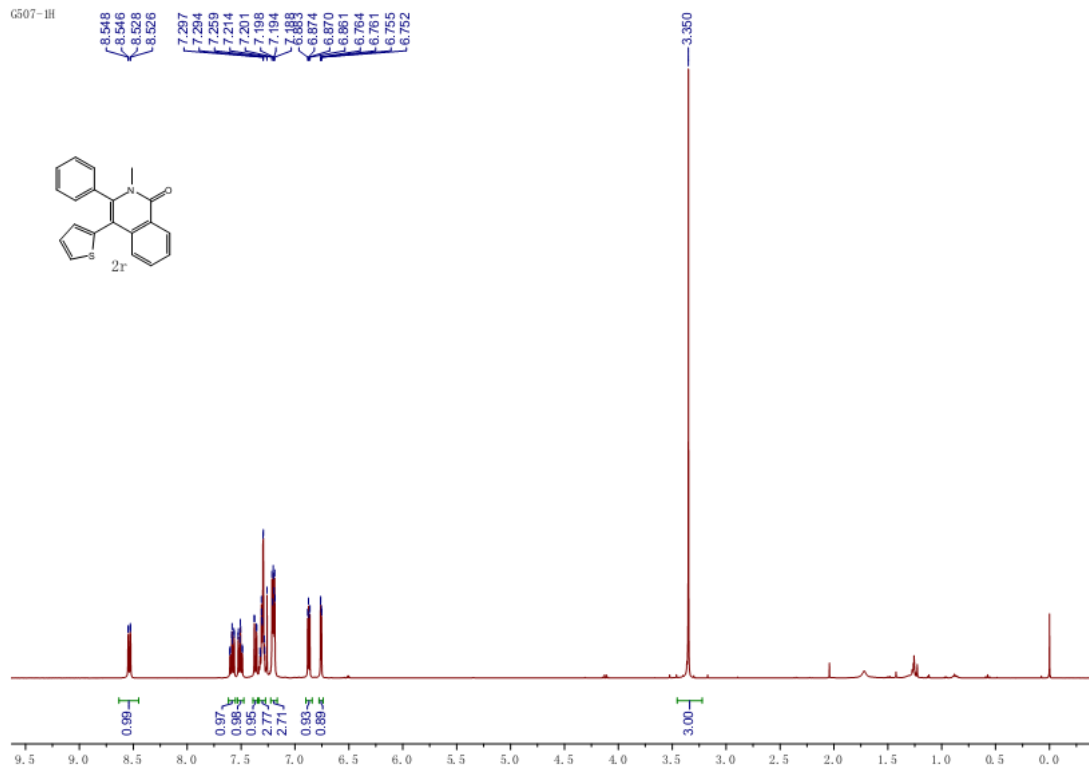

G507-IC

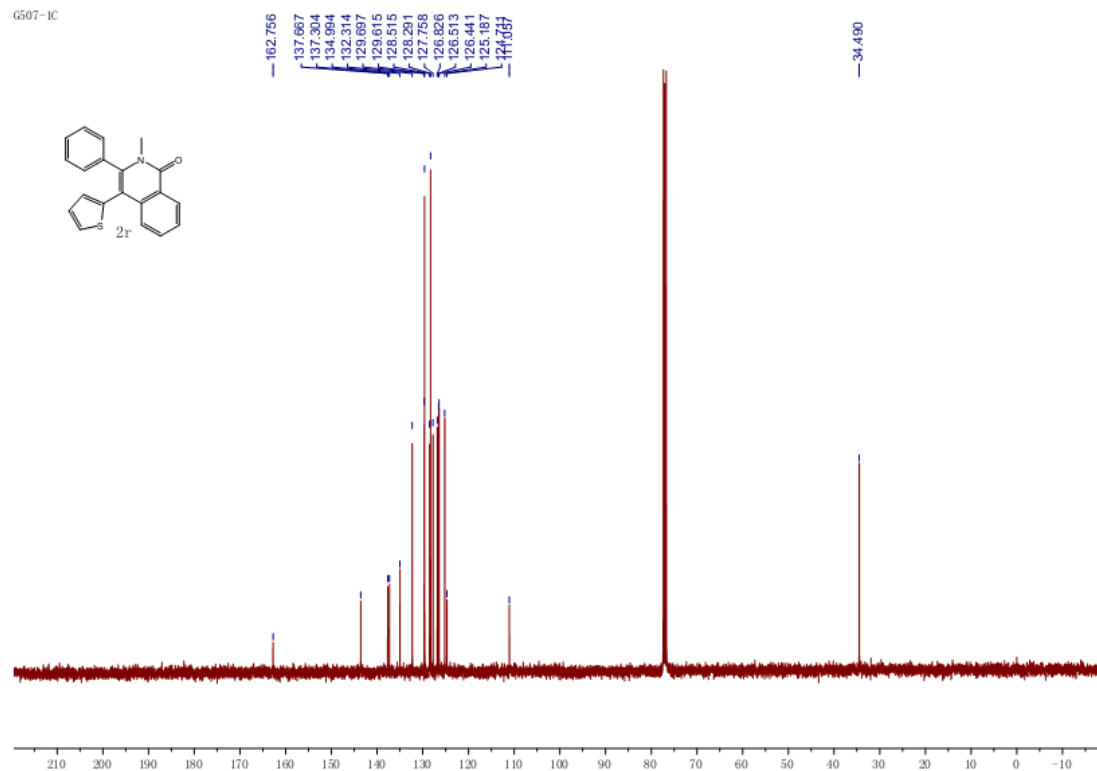

G291-III

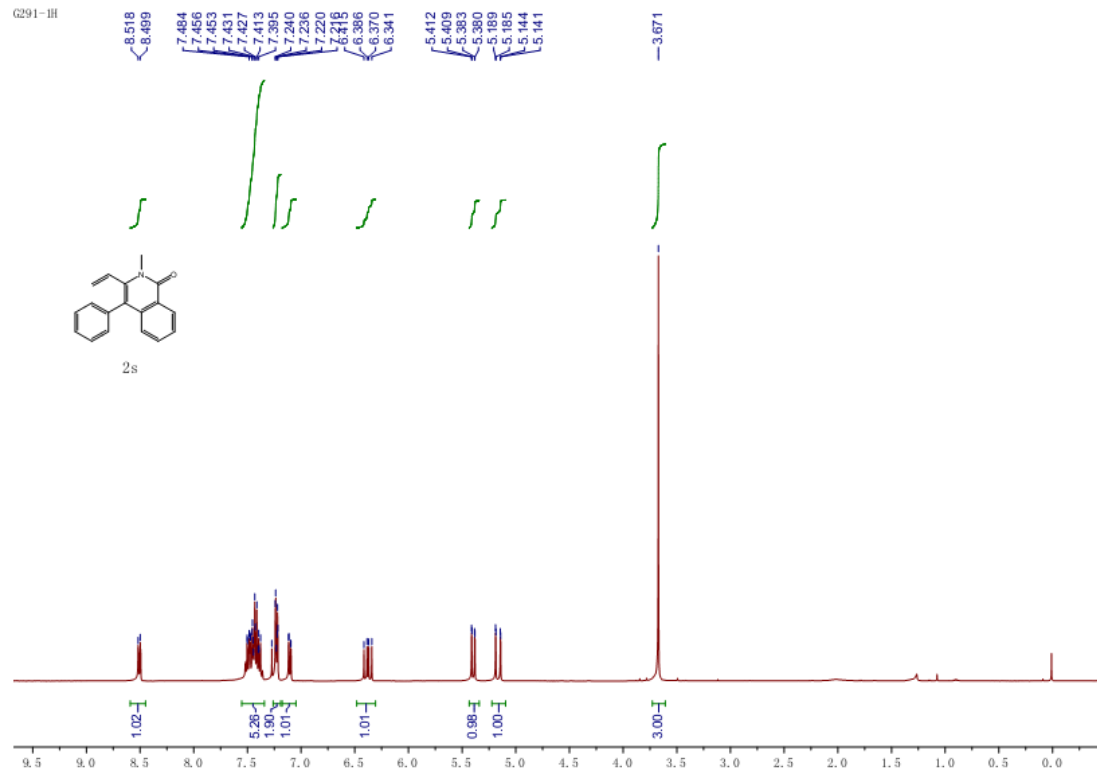

G291-IC

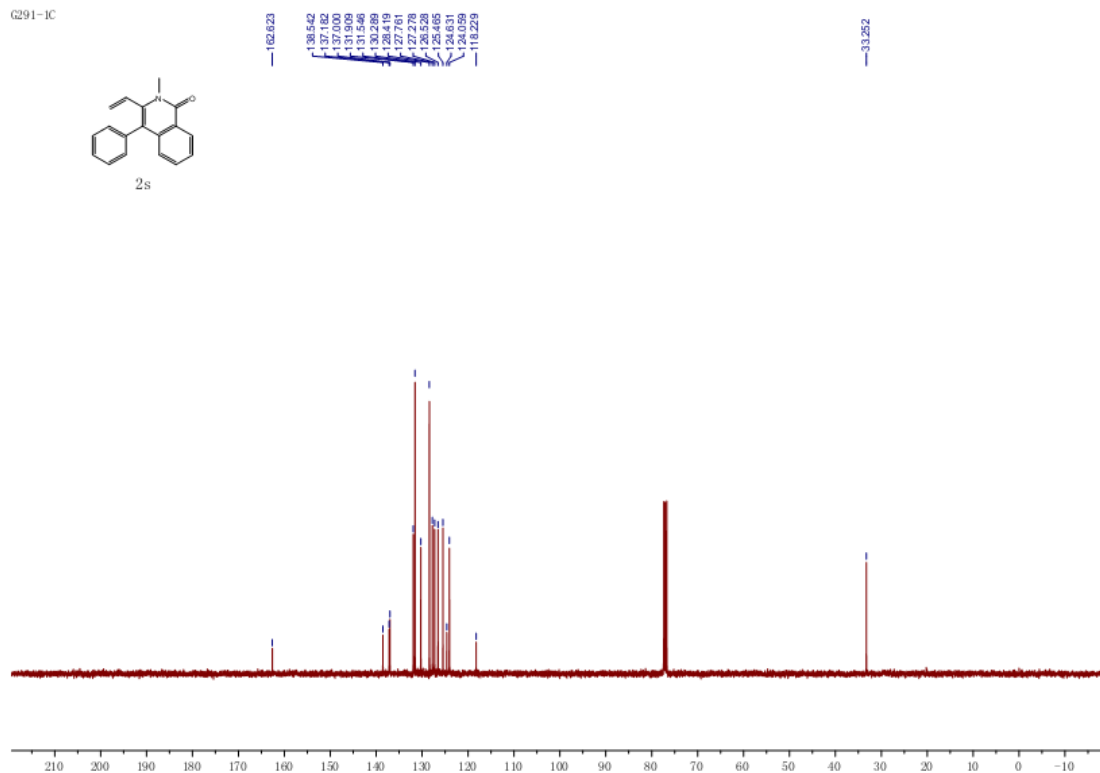



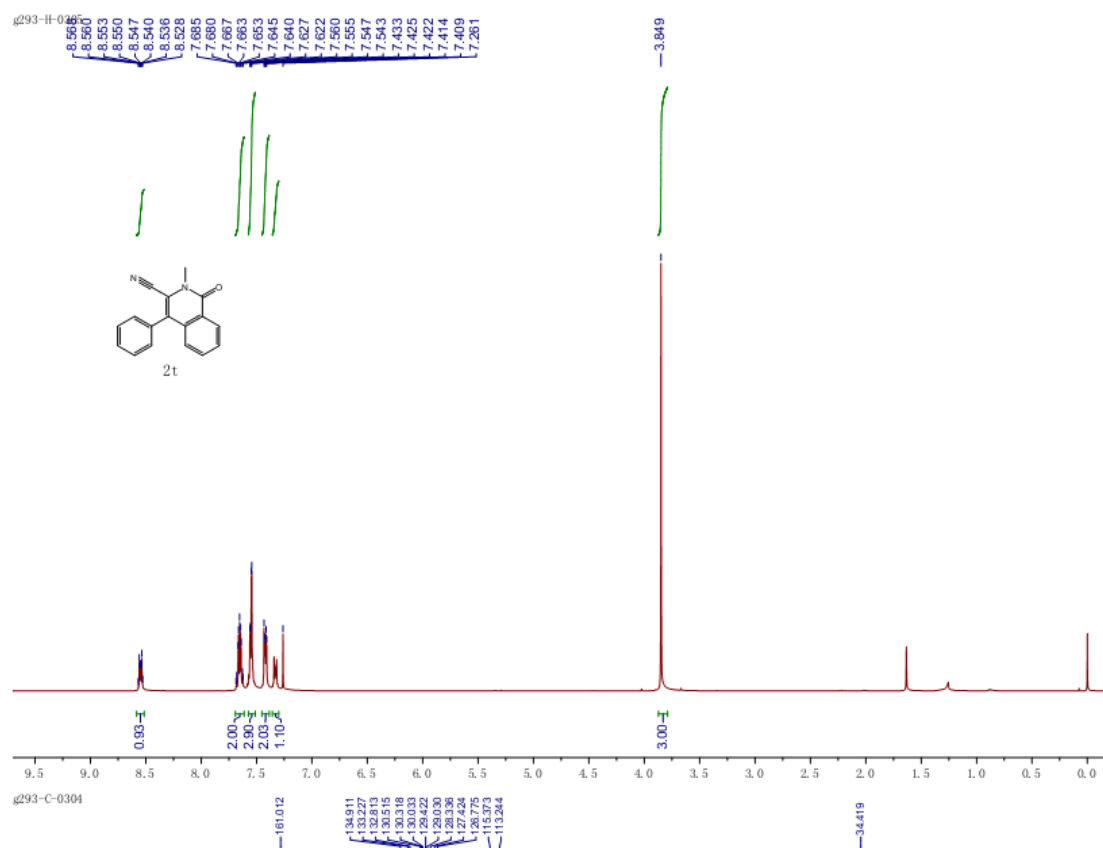

g220-H-1212

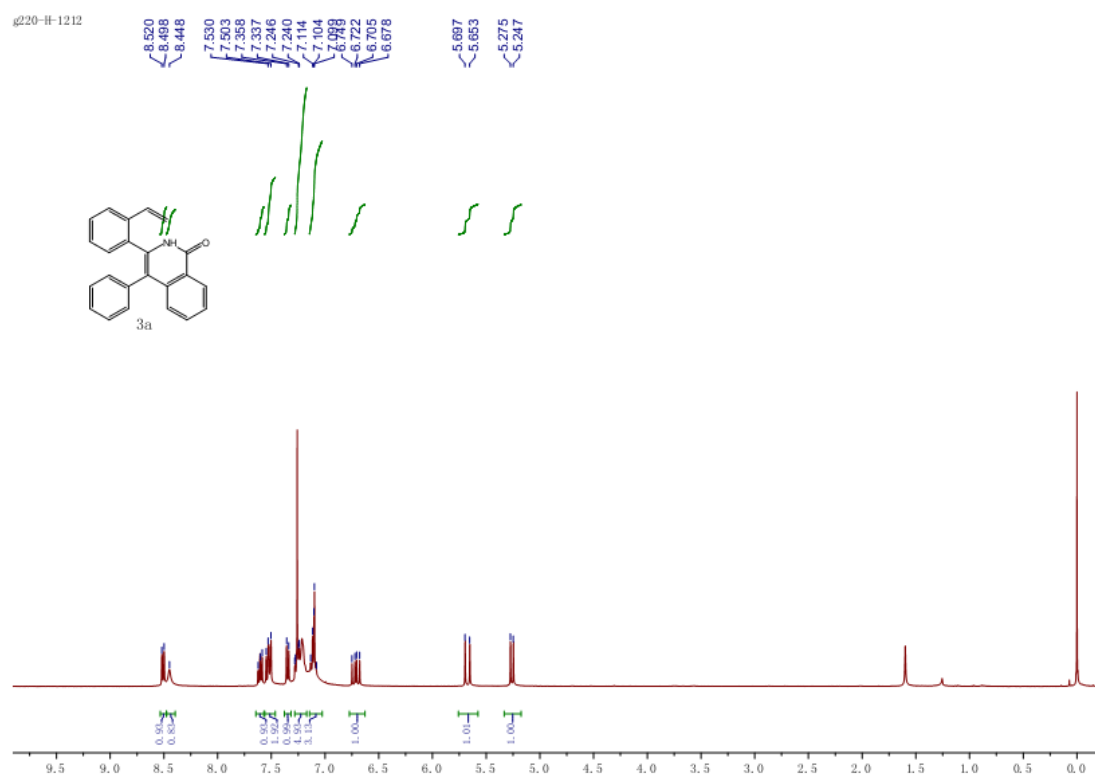

g220-C

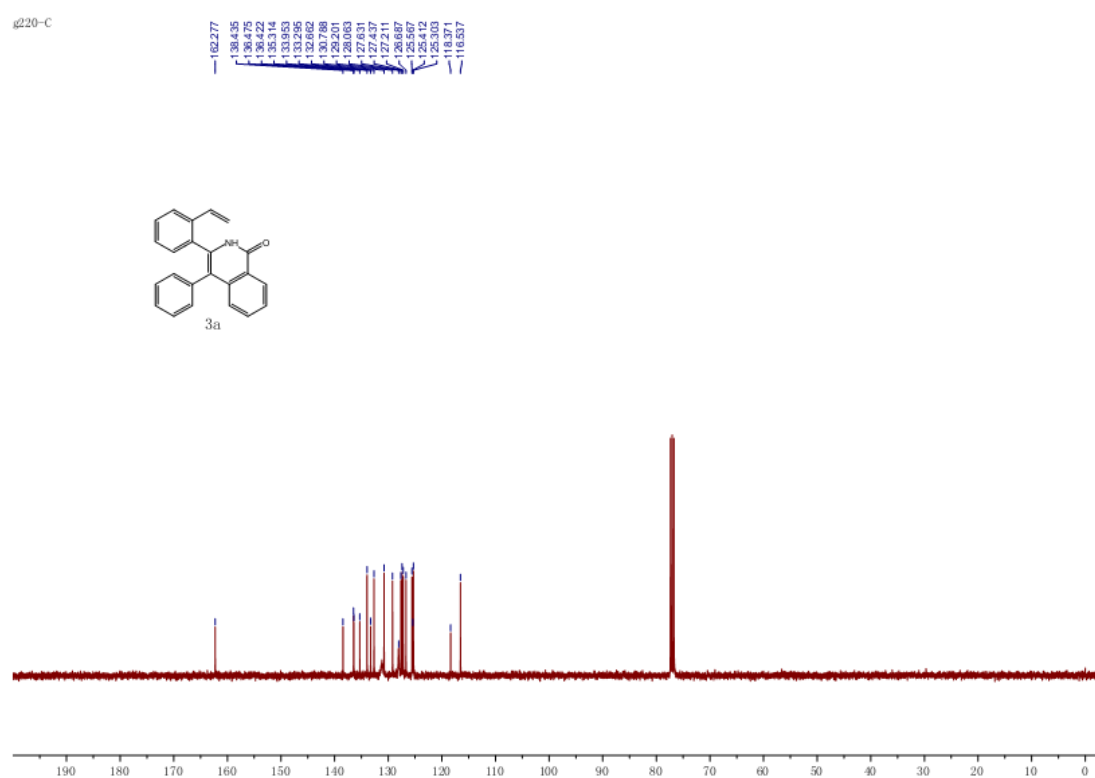

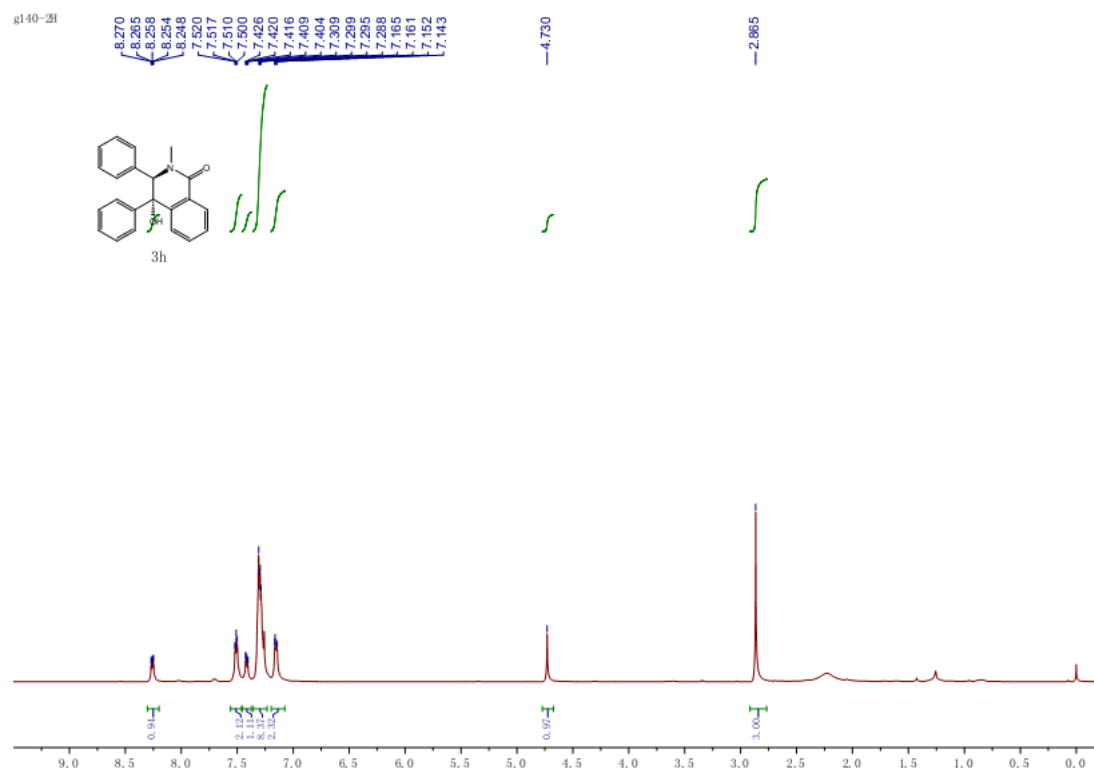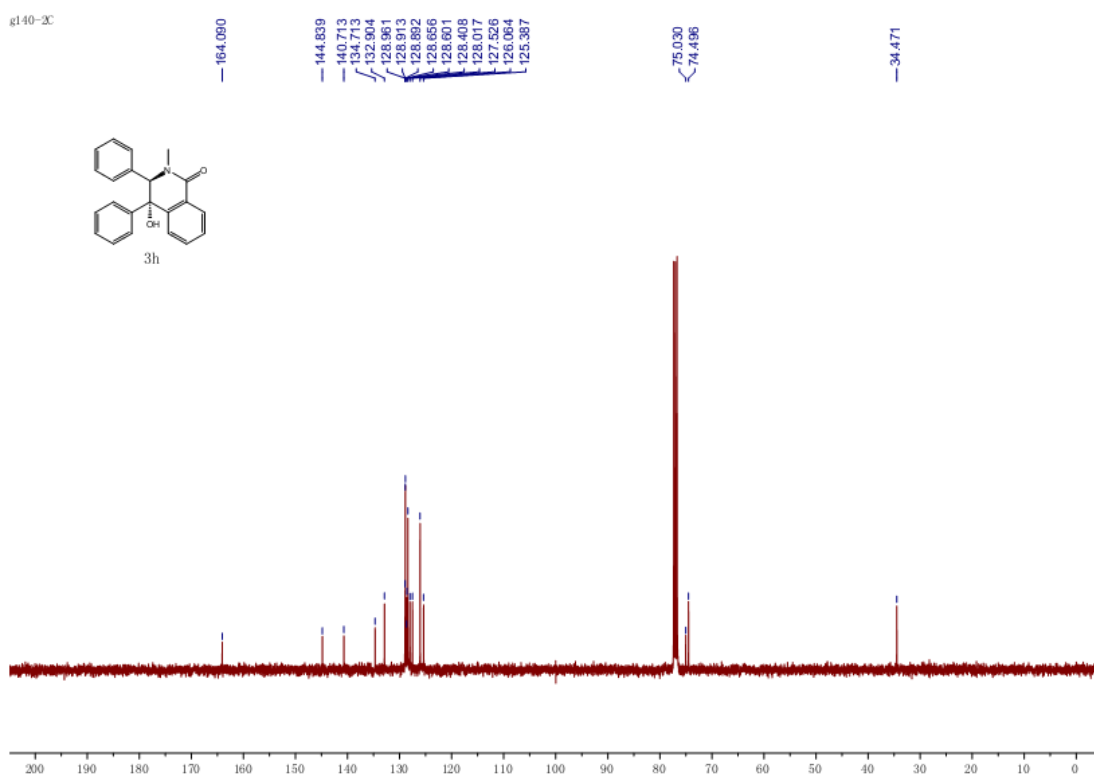

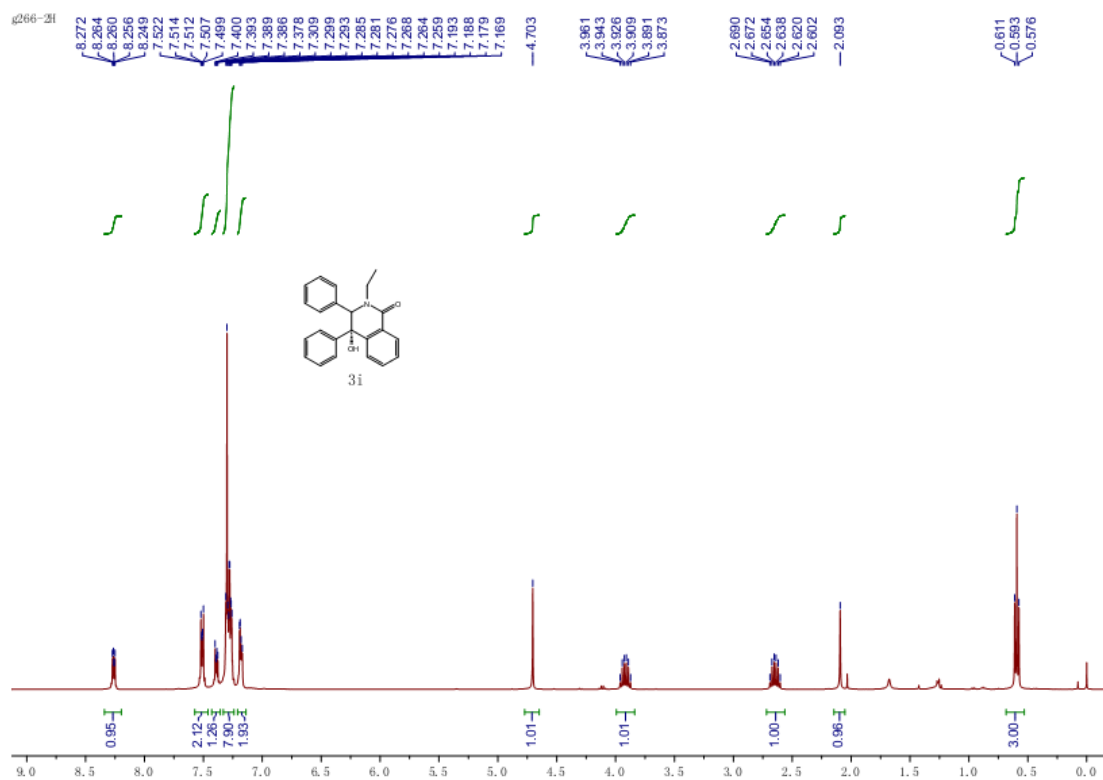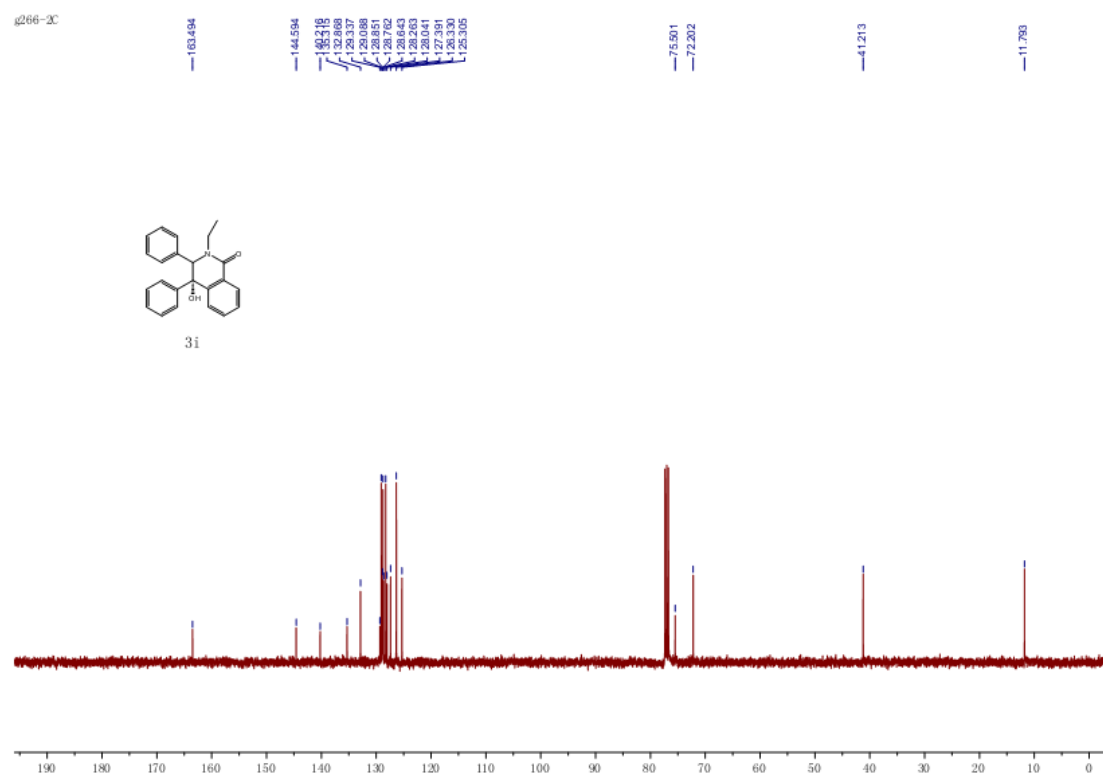



G287-2H

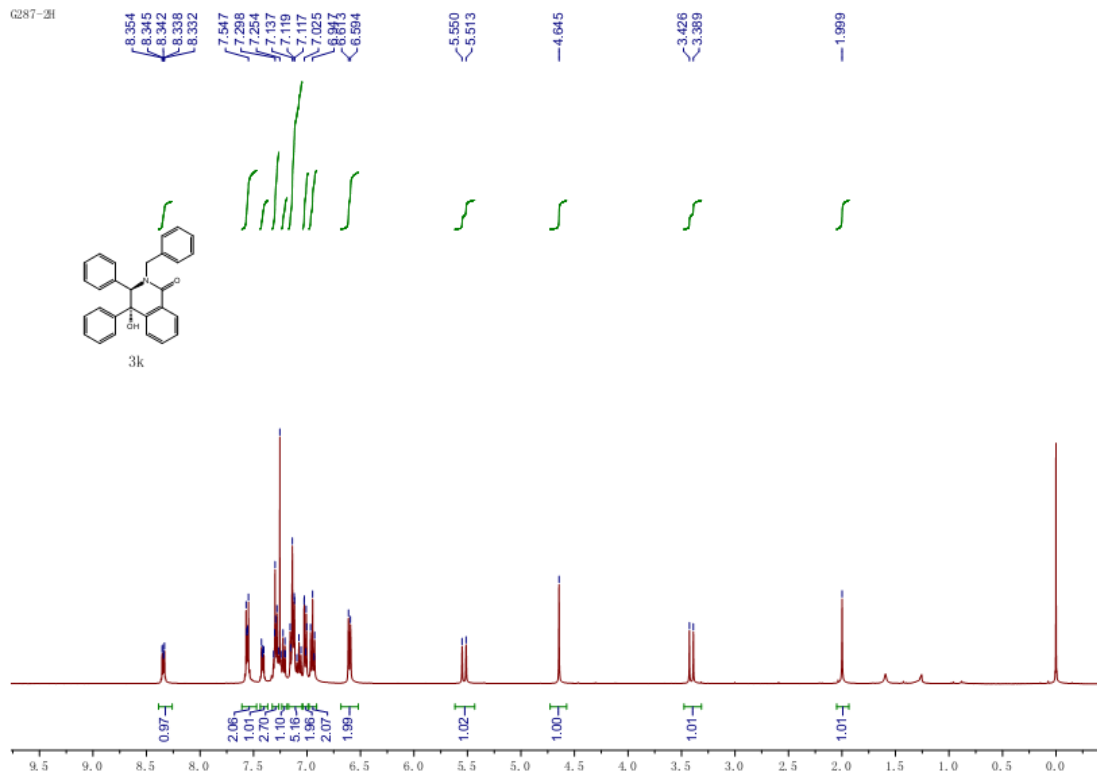

G287-2C

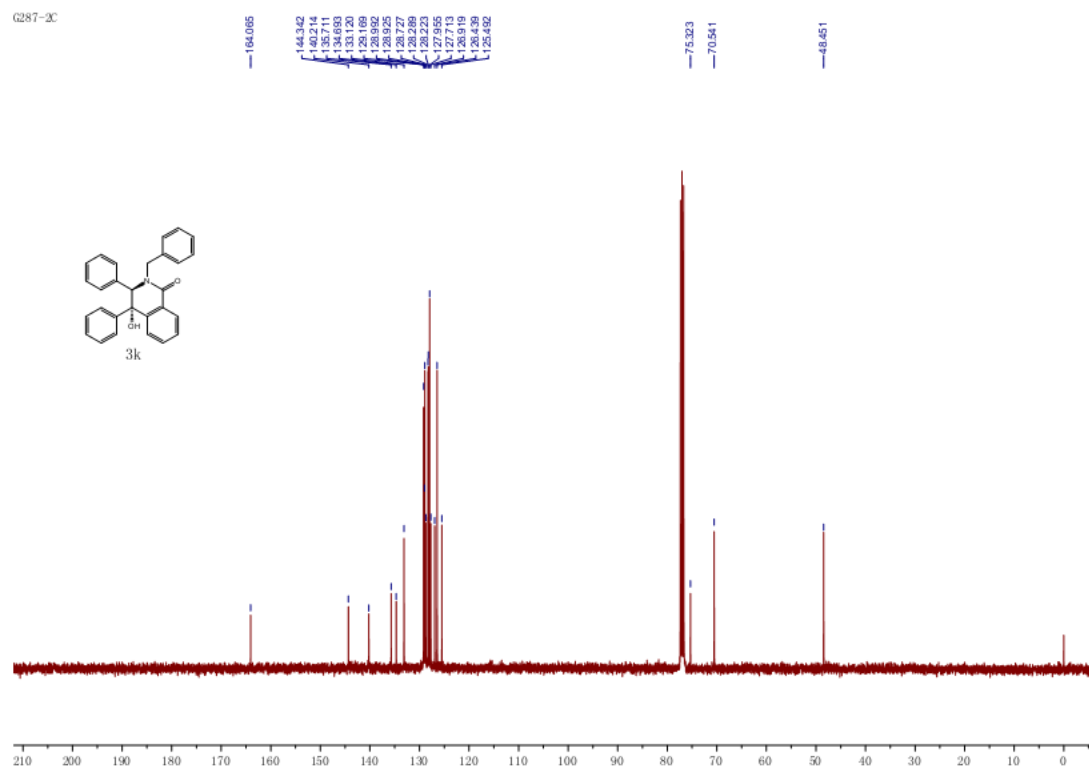

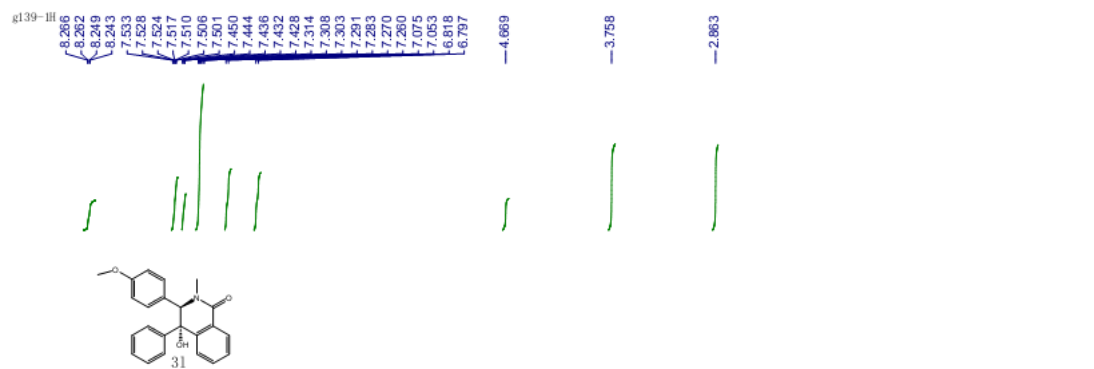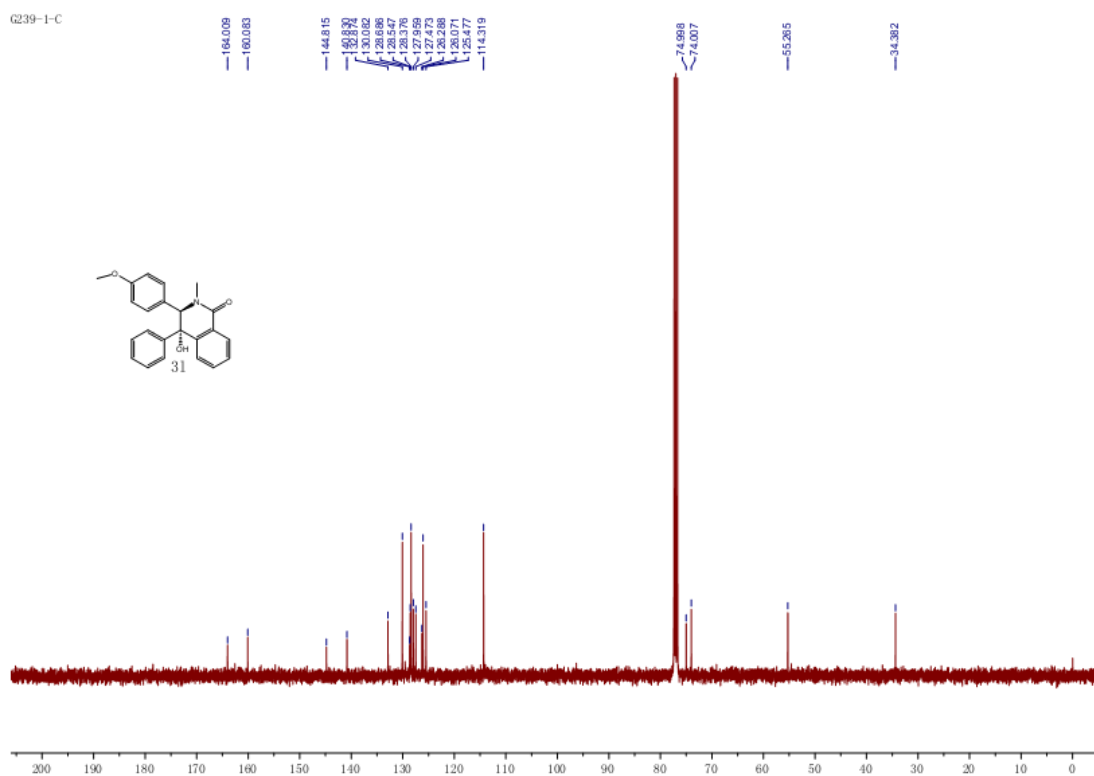

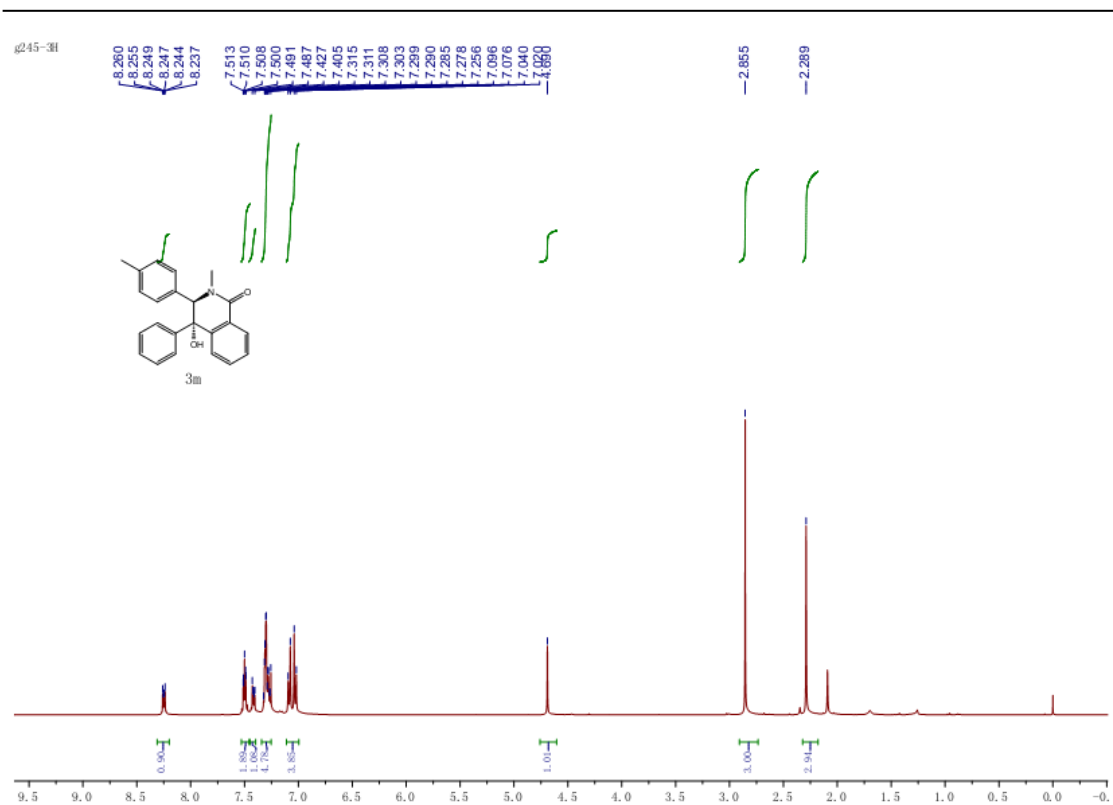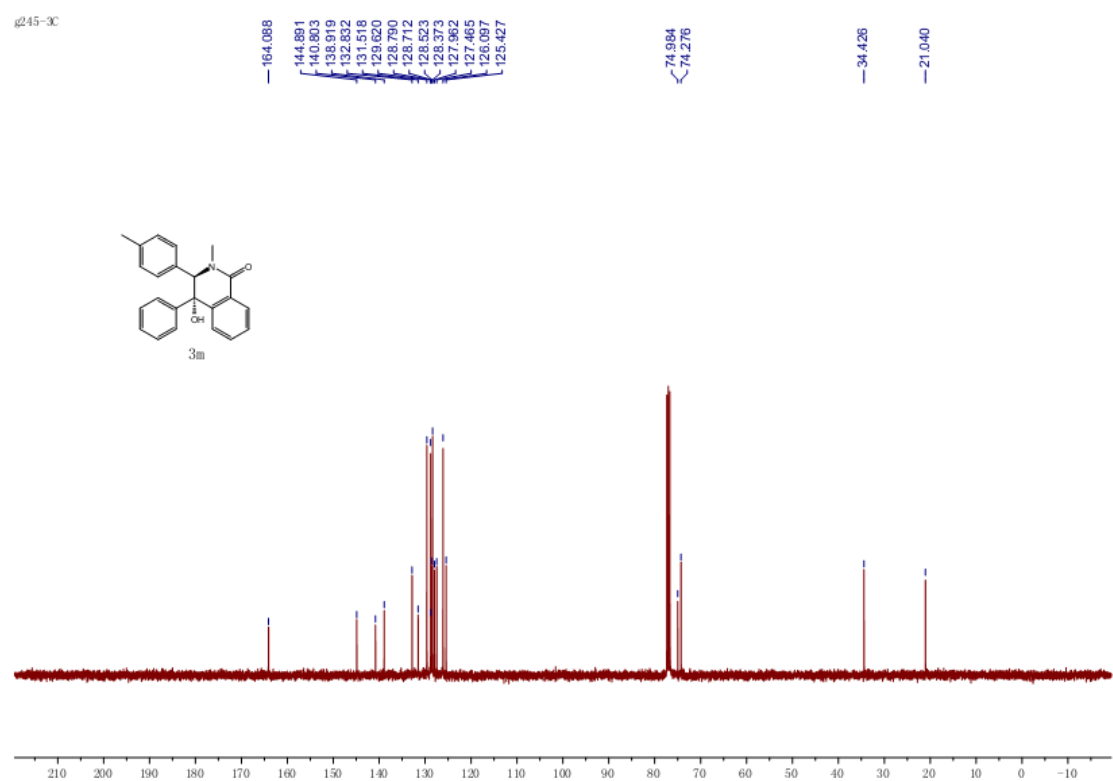



g231-H-1224

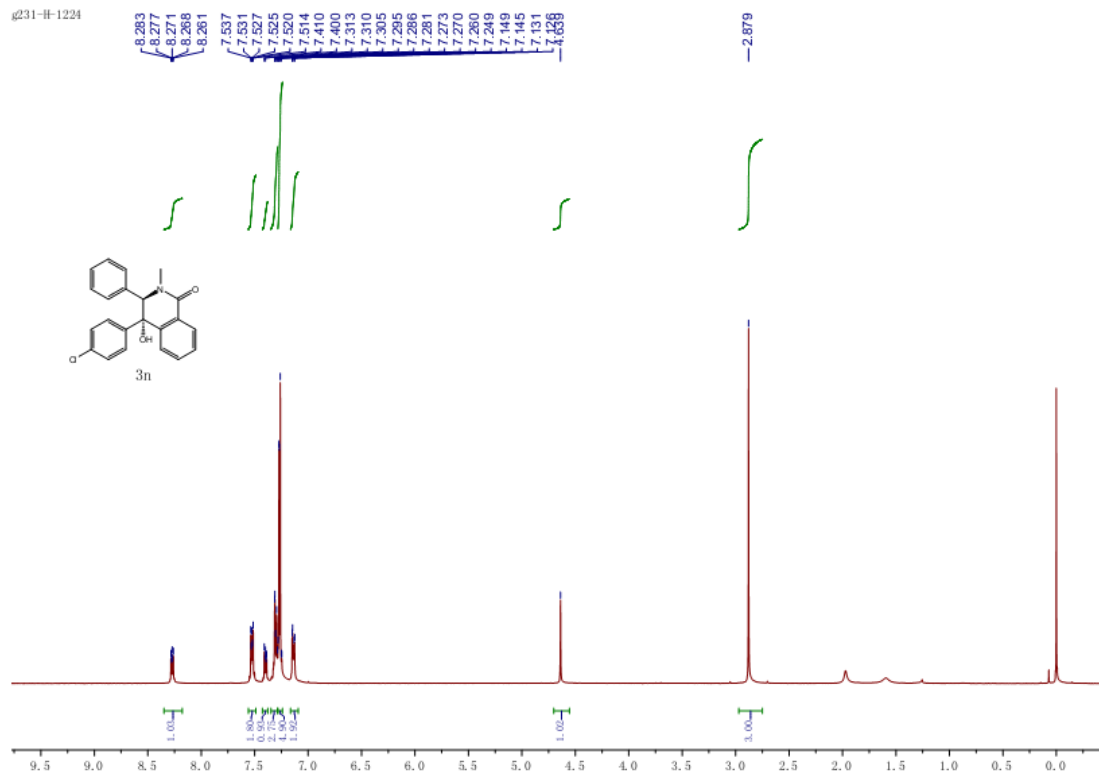

G231-1C

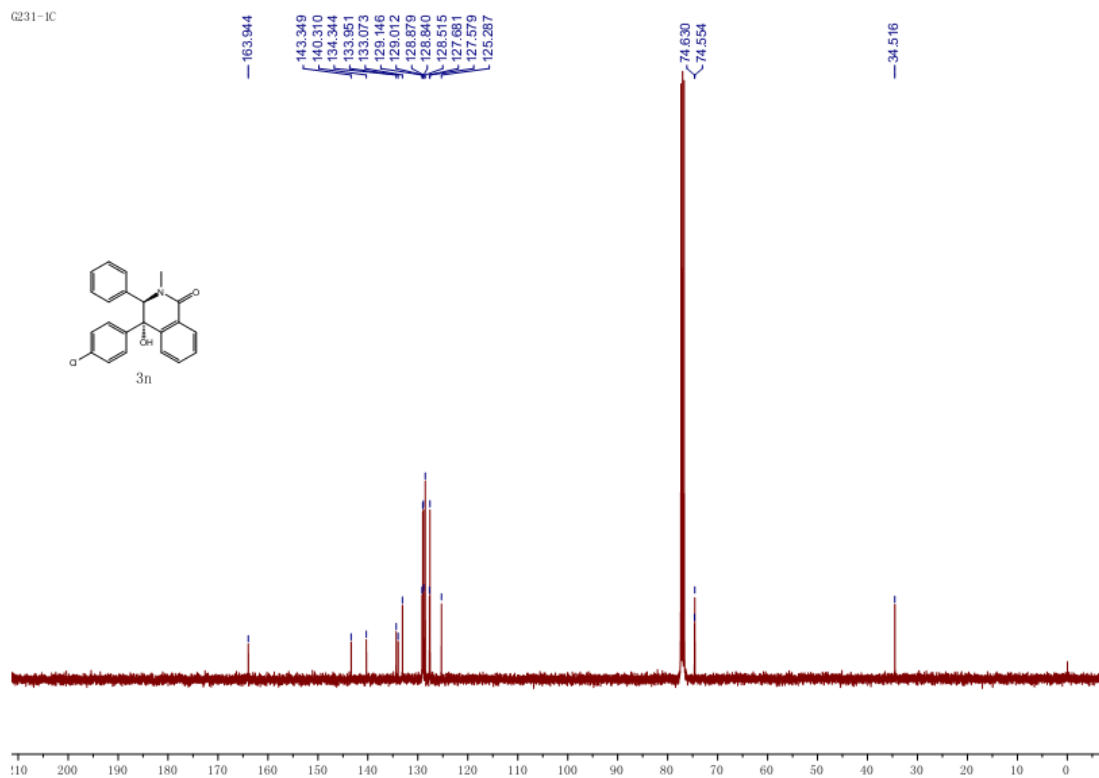

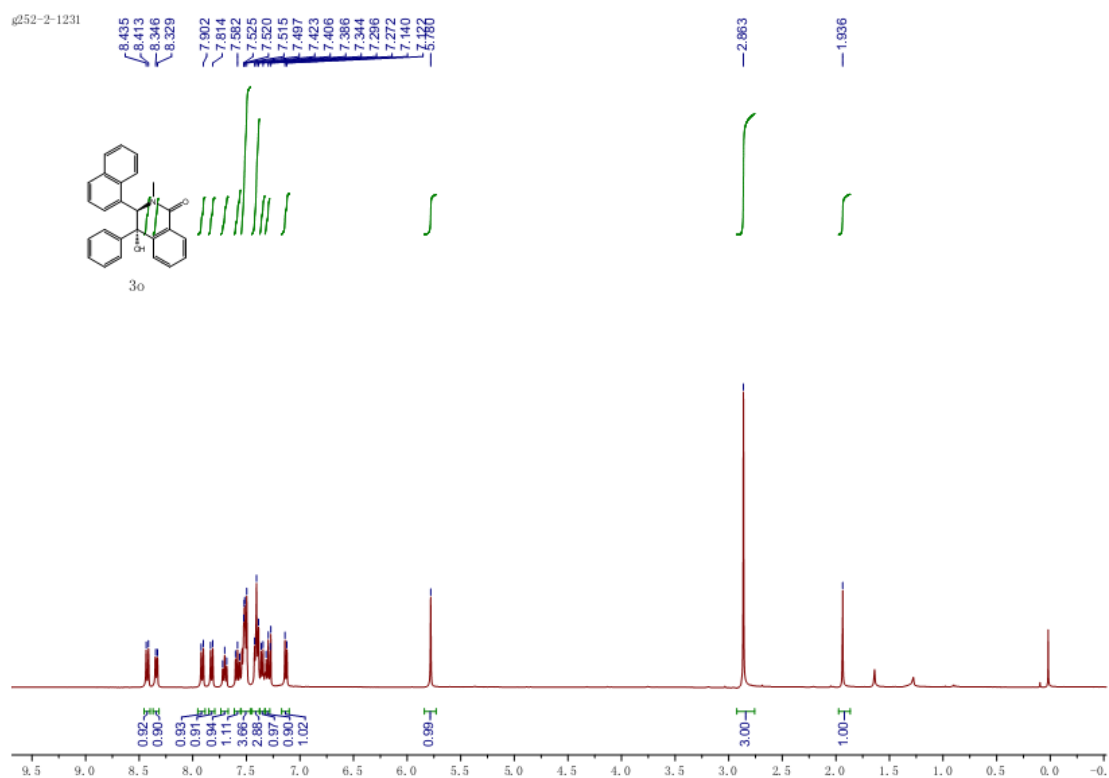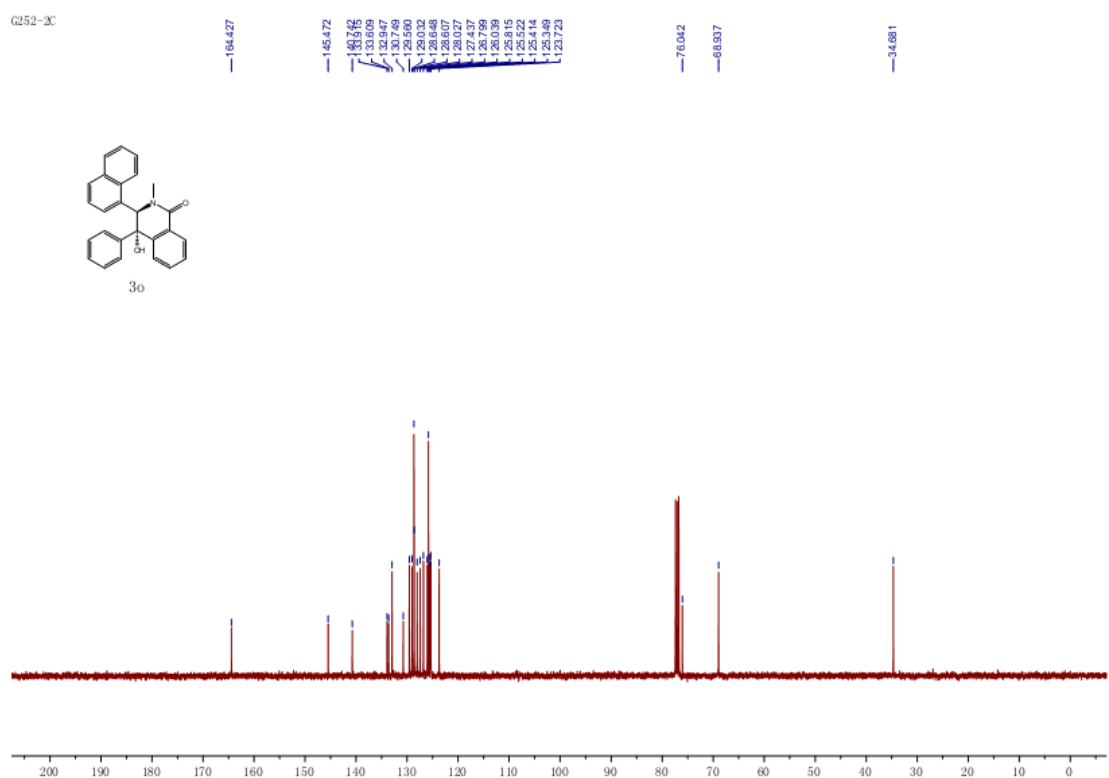

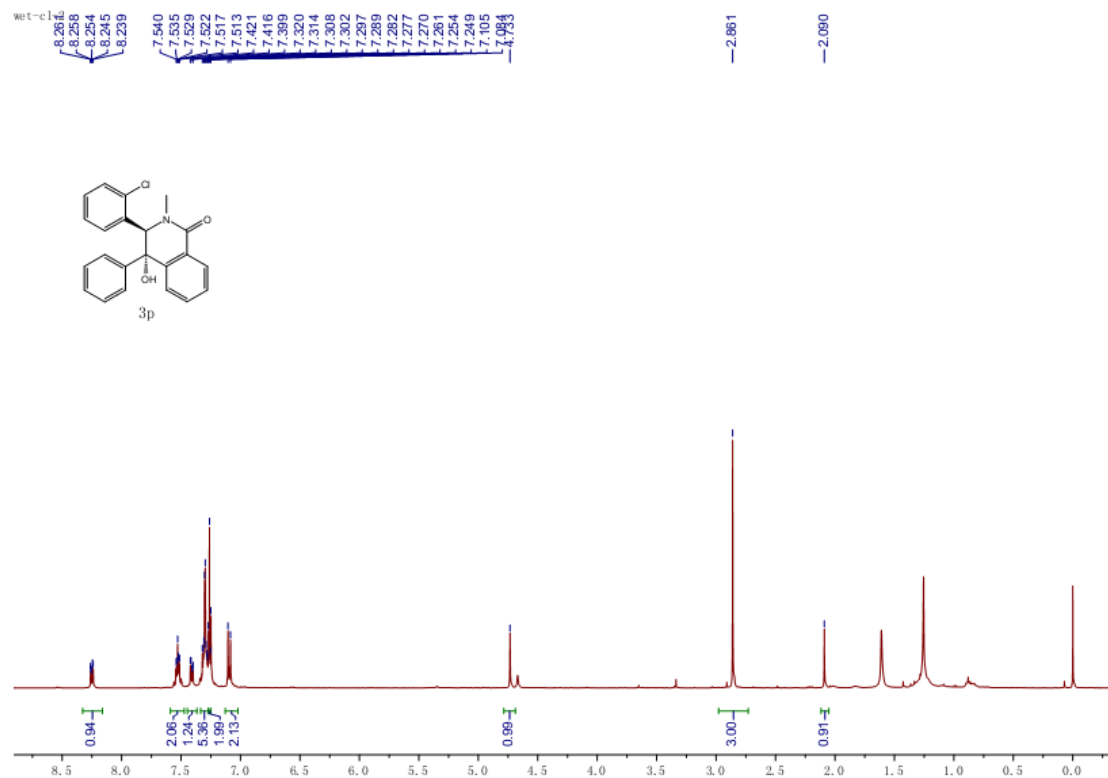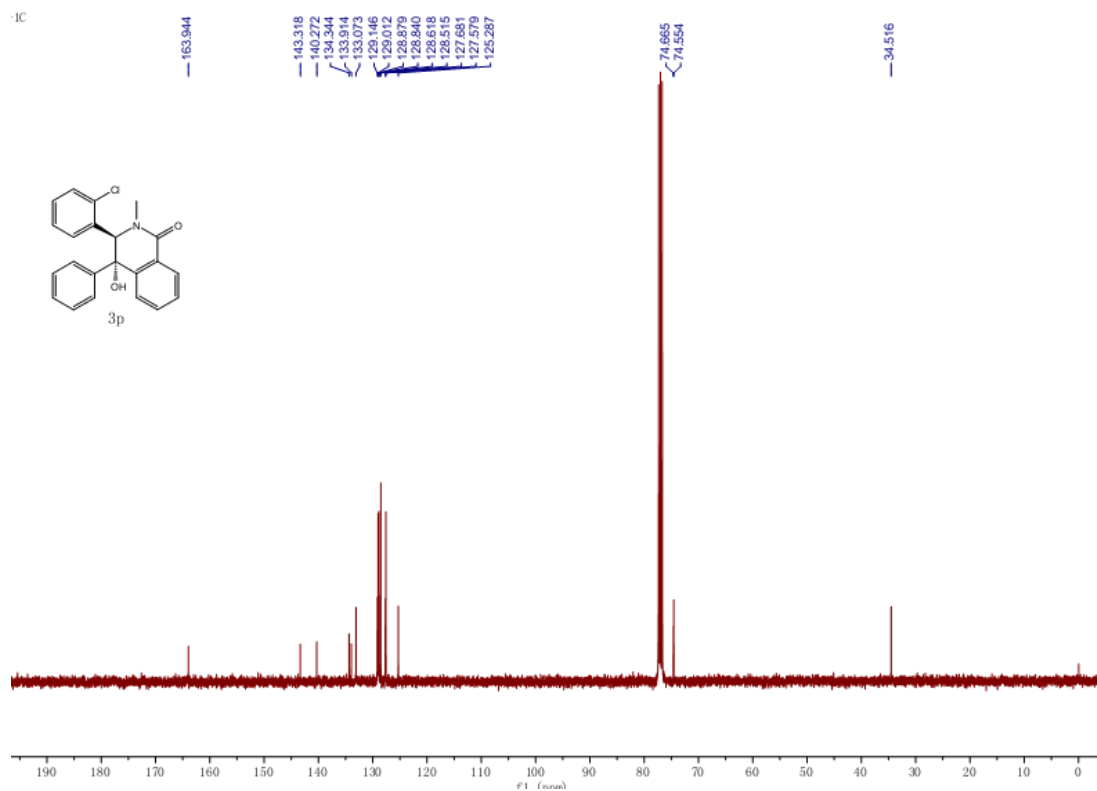

G507-2h

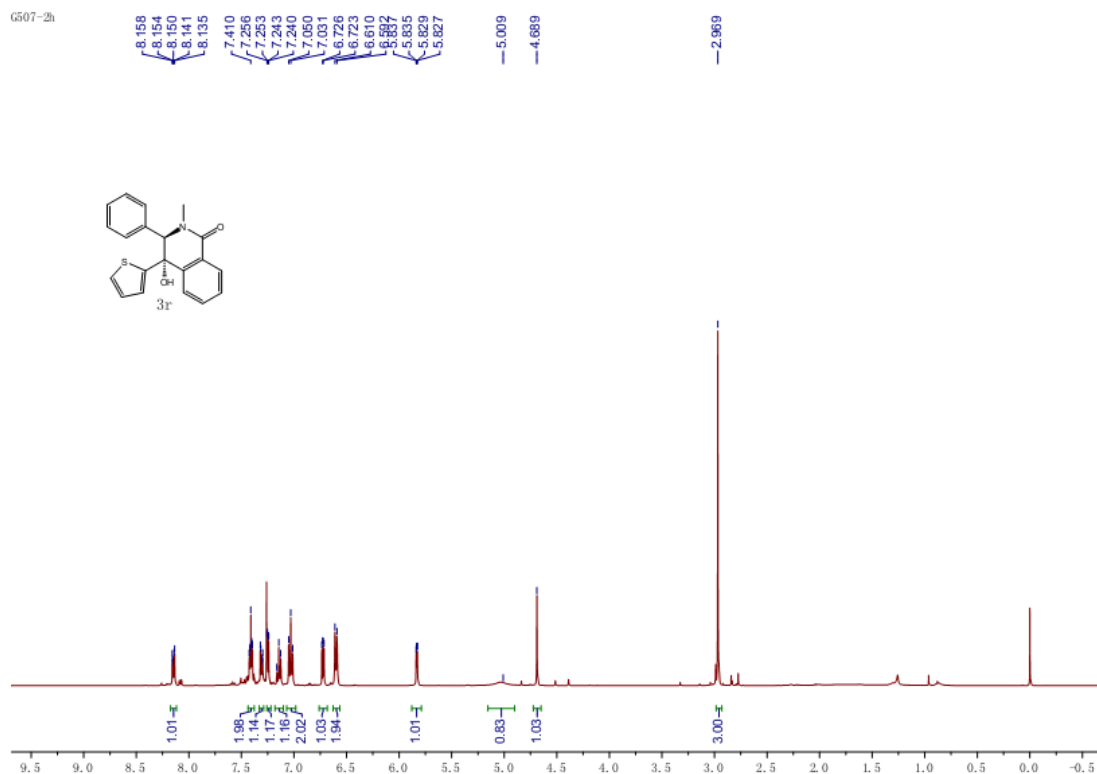

G507-2C

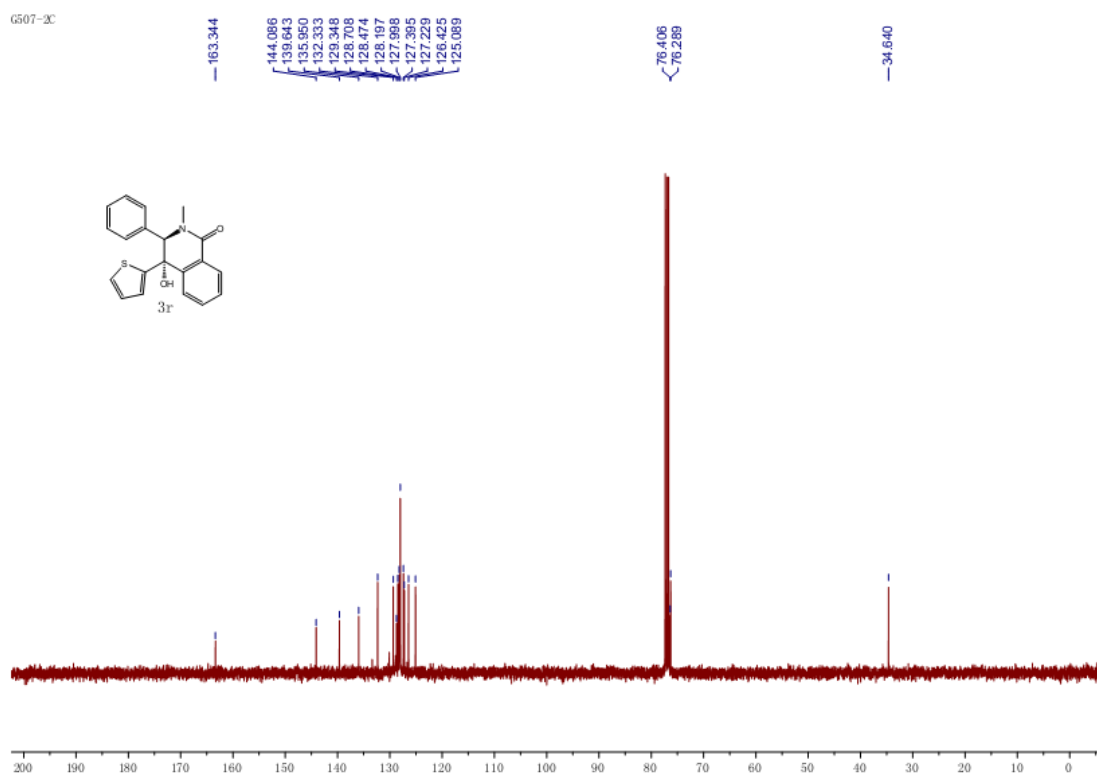

G274-2H

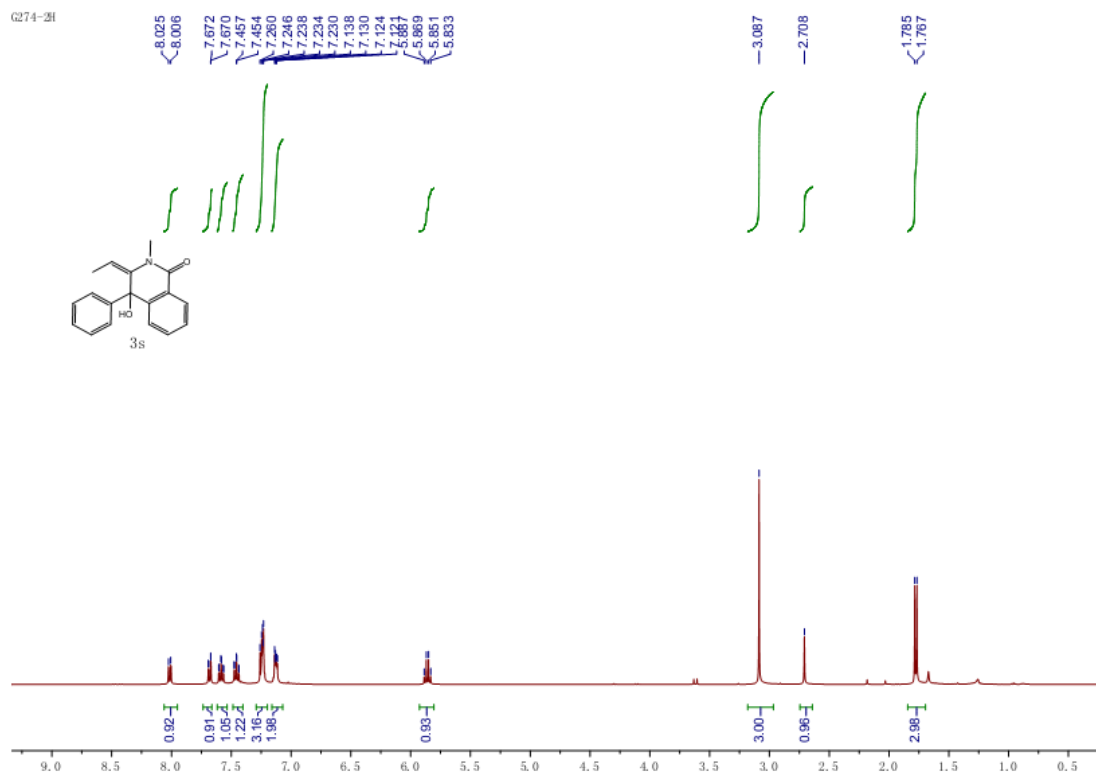

G274-2H

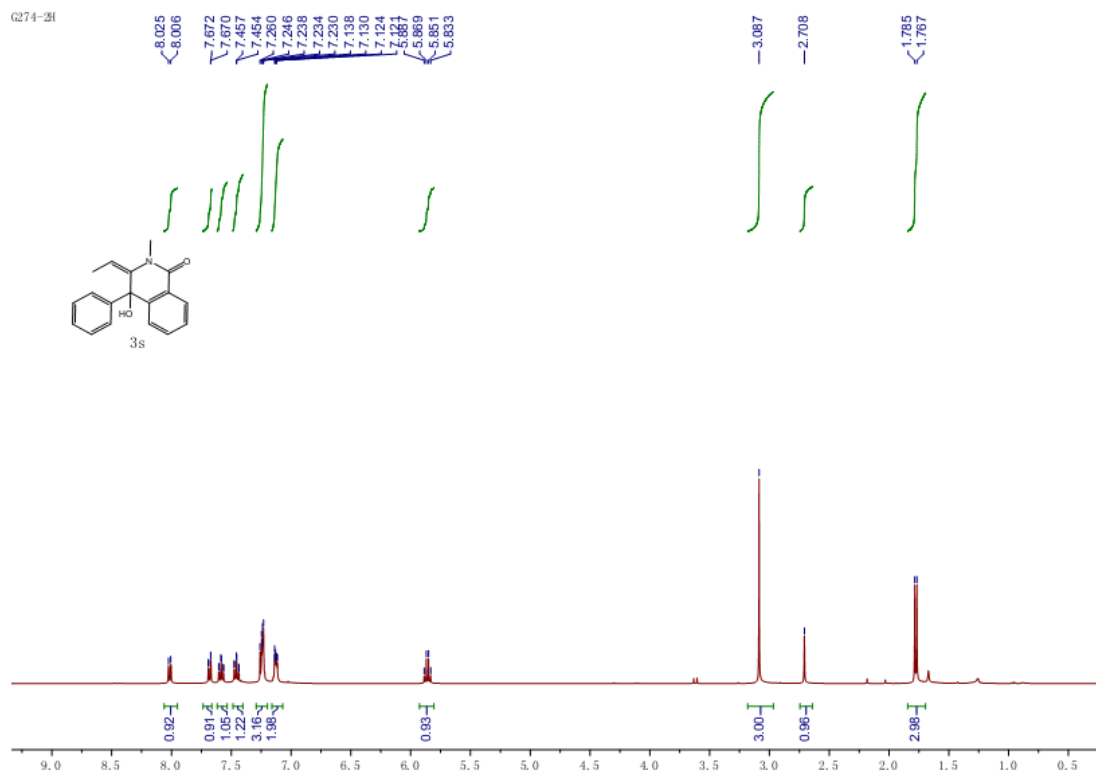

Supplement: c4ob01948b1.pdf [file c4ob01948b1.pdf]
